# Neurological disorder drug discovery from gene expression with tensor decomposition

Y-h. Taguchi<sup>†</sup> and Turki Turki<sup>\*</sup>

<sup>†</sup>Department of Physics, Chuo University, Tokyo 112-8551, Japan

<sup>\*</sup>King Abdulaziz University, Department of Computer Science, Jeddah 21589, Saudi Arabia

October 3, 2019

## Abstract

**Background:** Identifying effective candidate drug compounds in patients with neurological disorders based on gene expression data is of great importance to the neurology field. By identifying effective candidate drugs to a given neurological disorder, neurologists would (1) reduce the time searching for effective treatments; and (2) gain additional useful information that leads to a better treatment outcome. Although there are many strategies to screen drug candidate in pre-clinical stage, it is not easy to check if candidate drug compounds can be also effective to human.

**Objective:** We tried to propose a strategy to screen genes whose expression is altered in model animal experiments to be compared with gene expressed differentially with drug treatment to human cell lines.

**Methods:** Recently proposed tensor decomposition (TD) based unsupervised feature extraction (FE) is applied to single cell (sc) RNA-seq experiments of Alzheimer's disease model animal mouse brain.

**Results:** Four hundreds and one genes are screened as those differentially expressed during  $A\beta$  accumulation as age progresses. These genes are significantly overlapped with those expressed differentially with the known drug treatments for three independent data sets: LINCS, DrugMatrix and GEO.

**Conclusion:** Our strategy, application of TD based unsupervised FE, is useful one to screen drug candidate compounds using scRNA-seq data set.

keywords: Amyloid, Alzheimer Disease, Gene Expression, Single-Cell Analysis, Drug Discovery, Cell Line

## 1 Introduction

Drug discovery for neurological disorder has never been successful in spite of massive efforts spent [1]. One possible reason is because we generally do not

28 have suitable model animals for human neurological disorder [2]. Although a  
29 huge number of compounds are screened using model animals, only a few of  
30 them passed the human level screening. In this sense, it is required to screen  
31 candidate compounds using information retrieved from human at the earliest  
32 stage. One possible strategy to do this is the usage of human cell lines; Nev-  
33 ertheless, it is also not easy to perform, since generating cell line from human  
34 neurological disorder patients is not easy. In contrast to the cancer cell lines,  
35 which can be easily generated by immortalizing tumor cells, neuronal cells are  
36 hardly converted to cell lines, since mature neurons do not undergo cell divi-  
37 sion [3]. Therefore, it is difficult to test if candidate drugs work for human  
38 during pre-clinical stages.

39 In order to overcome this difficulty, we proposed an alternative strategy; com-  
40 paring disease gene expression with that of compound treated animals and/or  
41 human cell lines. Generally, compound screening is based upon phenotype; i.e.,  
42 evaluation of compounds efficiency is tested based upon if drug treatment can  
43 produce symptomatic improvement. Nevertheless, since it has been recently  
44 found that various neurological disorders share gene expression [4], focusing on  
45 gene expression profiles might be more reasonable. Following this strategy, we  
46 considered gene expression profiles (single cell RNA-seq) of mouse brain during  
47 amyloid  $\beta$  accumulation. As being aged, some set of gene expression progresses  
48 and significantly overlaps with genes that express differential expression caused  
49 by various compounds treatment. Since top ranked (i.e., with the most overlaps)  
50 detected compounds turn out to be tested previously toward Alzheimer disease  
51 (AD) treatment, lower ranked compounds also might be promising candidate  
52 compounds for AD.

53 Expression levels exhibit variations of scRNA-seq data used in this study  
54 due to contributions specific to genotypes, tissues, ages, sex, plates, wells, and  
55 interactions thereof. Hence, classical unsupervised decomposition methods are  
56 not well-suited to explore the six-way interactions and struggle to extract in-  
57 sights from data, hindering the process of finding effective drug compounds of  
58 a neurological disorder.

59 **Contributions.** Our contributions over existing work are summarized as  
60 follows:

- 61 – Whilst the application of tensor decomposition (TD) to the neurology  
62 domain is not new, previous developments, to the best of our knowledge,  
63 facilitated the neurological drug discovery process are not relevant to mod-  
64 eling the several interactions of scRNA-seq data used in this work. Our  
65 proposed tensor decomposition formalism is new, targeting neurological  
66 drug discovery of AD and constitutes a main contribution of this work.
- 67 – We present findings on an AD with a tensor decomposition formalism  
68 demonstrating the effectiveness of finding compounds for the treatment of  
69 AD.
- 70 – As similar to tensor decomposition techniques, the utilized tensor decom-  
71 position technique works under the unsupervised learning setting which is

72 more time effective than previous deployments that work under different  
73 learning settings, including the supervised learning setting.

74 – Unlike traditional machine and deep learning approaches that provide so-  
75 lutions to artificial intelligence when applied to plents of neurological dis-  
76 order problems, our approach blends techniques from linear algebra and  
77 statistics to yield a tensor decomposition technique utilizing a statistical  
78 linear algebra approach, requiring much less computational resources and  
79 time to reach a solution [5–7].

80 **Organization.** The rest of the paper is organized as follows. Section 2 intro-  
81 duces the tensor decomposition technique and the provided data to be analyzed.  
82 Section 3 presents the experimental results, followed by Section 4 to discuss the  
83 results. Section 5 concludes the work and points out future direction.

## 84 2 Materials and Methods

### 85 2.1 Single cell RNA-seq

86 Single cell (sc) RNA-seq used in this study was downloaded from gene expression  
87 omnibus (GEO) using GEO ID GSE127892. It is composed of two genotypes  
88 (APP\_NL-F-G and C57Bl/6), two tissues (Cortex and Hippocampus), four ages  
89 (3, 6, 12, and 21 weeks), two sex (male and female) and four 96 well plates.  
90 For each of combined combinations, four 96 well plates, each of wells includes  
91 one cell, were tested. Among those wells tested, wells with insufficient gene  
92 expression were discarded. As a result, among 2 (genotype)  $\times$  2 (tissues)  $\times$   
93 4 (ages)  $\times$  2 (sex)  $\times$  4 (plates)  $\times$  96 (wells) = 12288 cells measured, scRNA-seq  
94 for only 10801 cells were provided.

### 95 2.2 Tensor decomposition based unsupervised feature ex- 96 traction

97 We applied recently proposed TD based unsupervised feature extraction (FE) [8–  
98 18] to scRNA-seq. A tensor  $x_{j_1 j_2 j_3 j_4 j_5 j_6 i} \in \mathbb{R}^{96 \times 2 \times 2 \times 4 \times 2 \times 4 \times 29341}$  that repre-  
99 sents gene expression of  $i$ th gene of  $j_1$ th cell (well) at  $j_2$ th genotyoe ( $j_2 =$   
100 1:APP\_NL-F-G and  $j_2 = 2$ : C57Bl/6),  $j_3$ th tissue ( $j_3 = 1$ :Cortex and  $j_3 = 3$ :  
101 2:Hippocampus),  $j_4$ th age ( $j_4 = 1$ : three weeks,  $j_4 = 2$ : six weeks,  $j_4 = 3$ :  
102 twelve weeks, and  $j_4 = 4$ : twenty one weeks),  $j_5$ th sex ( $j_5 = 1$ :female and  
103  $j_5 = 2$ :male) and  $j_6$ th plate.

104  $x_{j_1 j_2 j_3 j_4 j_5 j_6 i}$  is standardized such that  $\sum_{i=1}^{29341} x_{j_1 j_2 j_3 j_4 j_5 j_6 i} = 0$  and  $\sum_{i=1}^{29341} x_{j_1 j_2 j_3 j_4 j_5 j_6 i}^2 =$   
105 29341. HOSVD [9] was applied to  $x_{j_1 j_2 j_3 j_4 j_5 j_6 i}$  such that

$$x_{j_1 j_2 j_3 j_4 j_5 j_6 i} = \sum_{\ell_1=1}^{96} \sum_{\ell_2=1}^2 \sum_{\ell_3=1}^2 \sum_{\ell_4=1}^4 \sum_{\ell_5=1}^2 \sum_{\ell_6=1}^4 \sum_{\ell_7=1}^{29341} G(\ell_1, \ell_2, \ell_3, \ell_4, \ell_5, \ell_6, \ell_7) u_{\ell_1 j_1} u_{\ell_2 j_2} u_{\ell_3 j_3} u_{\ell_4 j_4} u_{\ell_5 j_5} u_{\ell_6 j_6} u_{\ell_7 i} \quad (1)$$

106 where  $G(\ell_1, \ell_2, \ell_3, \ell_4, \ell_5, \ell_6, \ell_7) \in \mathbb{R}^{96 \times 2 \times 2 \times 4 \times 2 \times 4 \times 29341}$  is core tensor,  $u_{\ell_1 j_1} \in$   
107  $\mathbb{R}^{96 \times 96}$ ,  $u_{\ell_2 j_2} \in \mathbb{R}^{2 \times 2}$ ,  $u_{\ell_3 j_3} \in \mathbb{R}^{2 \times 2}$ ,  $u_{\ell_4 j_4} \in \mathbb{R}^{4 \times 4}$ ,  $u_{\ell_5 j_5} \in \mathbb{R}^{2 \times 2}$ ,  $u_{\ell_6 j_6} \in \mathbb{R}^{4 \times 4}$   
108 and  $u_{\ell_6 i} \in \mathbb{R}^{29341 \times 29341}$  are singular value matrices that are orthogonal matrices.  
109 In order to save time to compute, only  $1 \leq \ell_1, \ell_7 \leq 10$  were computed (The  
110 reason why we employed specifically HOSVD in this research will be discussed  
111 in the discussion section, because it is difficult to explain the reason before  
112 demonstrating how we make use of TD for data analysis).

113 After investigation of  $u_{\ell_4 j_4}$ ,  $u_{2 j_4}$  represent monotonic dependence upon age  
114 while  $\ell_1, \ell_2, \ell_3, \ell_5, \ell_6 = 1$  represent independence of cells, genotype, tissue,  
115 sex and plate. Since  $G(1, 1, 1, 2, 1, 1, 2)$  has the largest absolute vales among  
116  $G(1, 1, 1, 2, 1, 1, \ell_7)$ ,  $u_{2i}$  is employed to compute  $P$ -values attributed to  $i$ th gene  
117 as

$$P_i = P_{\chi^2} \left[ > \left( \frac{u_{2i}}{\sigma} \right)^2 \right] \quad (2)$$

118 where  $P_{\chi^2}[> x]$  is the cumulative probability of  $\chi^2$  distribution when the argu-  
119 ment is larger than  $x$  and  $\sigma$  is the standard deviation.

120  $P$ -values are corrected by Benjamini and Hochberg criterion [19] and genes  
121 associated with corrected  $P$ -values less than 0.01 are selected for downstream  
122 analysis.

## 123 2.3 Enrichment analysis

124 Four hundreds and one genes selected by TD based unsupervised FE were up-  
125 loaded to Enrichr [20] for enrichment analysis. Full list of enrichment analysis  
126 as well as list of 401 genes are accessible at  
127 <https://amp.pharm.mssm.edu/Enrichr3/enrich?dataset=5bbbe5602715daf9787895cd16829707>

128 List of 401 genes and three enrichment analyses used in this study, “LINCS  
129 L1000 Chem Pert up”, “DrugMatrx” and “Drug Perturbations from GEO up”  
130 are also available as supplementary material.

131 Ranks are based upon adjusted P-values (not those provided by Enrichr).

## 132 3 Results

133 As a unsupervised technique applied to scRNA-seq data set, we employ tensor  
134 decomposition [21] that was sometimes applied to gene expression analysis [22].

### 135 3.1 Synthetic study of TDs

136 Before performing TD based unsupervised FE, we perform some synthetic study  
137 for some TDs.

138 We prepared two synthetic data sets,  $x_{ijk} \in \mathbb{R}^{N \times N \times N}$  defined as

$$x_{ijk} = v_i v_j v_k + v'_i v'_j v'_k \quad (3)$$

139 where  $v'_i = v_{i+1}$  for  $i \leq N - 1$  and  $v'_N = v_1$ .

140 For data set 1 (Fig. 1(A) and (B)),

$$v_i = \begin{cases} 0 & 1 \leq i \leq \frac{N}{2} \\ 1 & \frac{N}{2} < i \leq N \end{cases} \quad (4)$$

141 and for data set 2 (Fig. 1(C) and (D)).

$$v_i = i \quad (5)$$

142 We apply HOSVD, CP decomposition and CMTF [23] to these two synthetic  
143 data set with  $N = 10$ . At first, we applied HOSVD to data set 1 and 2 as

$$x_{ijk} = \sum_{\ell_1=1}^N \sum_{\ell_2=1}^N \sum_{\ell_3=1}^N G(\ell_1, \ell_2, \ell_3) u_{\ell_1 i}^{(i)} u_{\ell_2 j}^{(j)} u_{\ell_3 k}^{(k)} \quad (6)$$

144 where  $G(\ell_1, \ell_2, \ell_3), u_{\ell_1 i}^{(i)}, u_{\ell_2 j}^{(j)}, u_{\ell_3 k}^{(k)} \in \mathbb{R}^{N \times N \times N}$ . Then we noticed that only four  
145  $G$ s with  $(\ell_1, \ell_2, \ell_3) = (1, 1, 1), (1, 2, 2), (2, 1, 2), (2, 2, 1)$  have non zero values for  
146 both data set 1 and 2. Figs. 2 and 3 show  $u_{\ell_1 i}^{(i)}, u_{\ell_2 j}^{(j)}, u_{\ell_3 k}^{(k)}$  and

$$\sum_{(\ell_1, \ell_2, \ell_3) \in \{(1,1,1), (1,2,2), (2,1,2), (2,2,1)\}} G(\ell_1, \ell_2, \ell_3) u_{\ell_1 i}^{(i)} u_{\ell_2 j}^{(j)} u_{\ell_3 k}^{(k)} \quad (7)$$

147 It is obvious that HOSVD successfully performs TD (Figs. 2(C) and 3(C))  
148 although obtained singular value vectors (Figs. 2(A) and (B) and 3(A) and  
149 (B)) are not equivalent to Fig. 1 because HOSVD assumes the orthogonality  
150 between singular value vectors. The first singular value vectors,  $u_{1j}^{(j)}, u_{1i}^{(i)}, u_{1k}^{(k)}$   
151 (Figs. 2(A) and 3(A)), clearly represent somewhat means of  $\mathbf{v}$  (Figs. 1(A) and  
152 1(C)) and  $\mathbf{v}'$  (Figs. 1(B) and 1(D)) while the second singular value vectors,  
153  $u_{2j}^{(j)}, u_{2i}^{(i)}, u_{2k}^{(k)}$  (Figs. 2(B) and 3(B)), clearly represent difference of them.

154 Next we applied CP decomposition to data set 1 and 2: eqs. (4) and (5)  
155 (Fig. 1). It is obvious that CP decomposition (Fig. 4) applied to data set 1  
156 successfully reproduced (Fig. 4(A) and (B)) eq. (3) with eq. (4) (Fig. 1(A) and  
157 (B)). On the other hand, CP decomposition (Fig. 5) applied to data set 2 could  
158 not, but required up to the third singular value vectors (Fig. 5(A), (B) and  
159 (C)). Since CP decomposition depends upon initial values, although we tried  
160 multiple initial values, as far as we tried, we could not find the initial values  
161 by which CP decomposition can reproduce eq. (3) using eq. (5) (Fig. 1(C)  
162 and (D)). In contrast to HOSVD that clearly decomposed  $\mathbf{v}$  and  $\mathbf{v}'$  into their  
163 mean and difference, it is unclear what Fig. 5 represents anymore. Thus, it is  
164 obvious whether CP decomposition can perform better than HOSVD is highly  
165 dependent upon the data set we analyze. In this sense, HOSVD is less affected  
166 by the type of data set analyzed.

167 Finally, we applied CMTF to data sets 1 and 2 (Fig. 1). In order that, we  
168 need to specify loss function,  $f$ , to be minimized;

$$f(U^{(i)}, U^{(j)}, U^{(k)}, \mathbf{a}^{(i)}, \mathbf{a}^{(j)}, \mathbf{a}^{(k)}) = \sum_{ijk} \left| x_{ijk} - \sum_{\ell=1}^R u_{\ell i}^{(i)} u_{\ell j}^{(j)} u_{\ell k}^{(k)} \right|^2$$

$$\begin{aligned}
 & + \sum_i \left| v_i - \sum_{\ell=1}^R a_{\ell}^{(i)} u_{\ell i}^{(i)} \right|^2 \\
 & + \sum_j \left| v_j - \sum_{\ell=1}^R a_{\ell}^{(j)} u_{\ell j}^{(j)} \right|^2 \\
 & + \sum_k \left| v_k - \sum_{\ell=1}^R a_{\ell}^{(k)} u_{\ell k}^{(k)} \right|^2 \tag{8}
 \end{aligned}$$

169 where  $U^{(i)}, U^{(j)}, U^{(k)} \in \mathbb{R}^{N \times R}$  are defined as

$$U^{(i)} = \left( \mathbf{u}_1^{(i)}, \dots, \mathbf{u}_R^{(i)} \right) \tag{9}$$

$$U^{(j)} = \left( \mathbf{u}_1^{(j)}, \dots, \mathbf{u}_R^{(j)} \right) \tag{10}$$

$$U^{(k)} = \left( \mathbf{u}_1^{(k)}, \dots, \mathbf{u}_R^{(k)} \right) \tag{11}$$

170 with  $\mathbf{u}_{\ell}^{(i)}, \mathbf{u}_{\ell}^{(j)}, \mathbf{u}_{\ell}^{(k)} \in \mathbb{R}^N$  defined as

$$\mathbf{u}_{\ell}^{(i)} = \begin{pmatrix} u_{\ell 1}^{(i)} \\ \vdots \\ u_{\ell N}^{(i)} \end{pmatrix} \tag{12}$$

$$\mathbf{u}_{\ell}^{(j)} = \begin{pmatrix} u_{\ell 1}^{(j)} \\ \vdots \\ u_{\ell N}^{(j)} \end{pmatrix} \tag{13}$$

$$\mathbf{u}_{\ell}^{(k)} = \begin{pmatrix} u_{\ell 1}^{(k)} \\ \vdots \\ u_{\ell N}^{(k)} \end{pmatrix} \tag{14}$$

171 With coefficient vectors,  $\mathbf{a}^{(i)}, \mathbf{a}^{(j)}, \mathbf{a}^{(k)} \in \mathbb{R}^R$ ,  $\mathbf{v}$  is required to be expressed by  
 172 the linear transformation of  $U^{(i)}, U^{(j)}, U^{(k)}$ .

173 After trying to apply CMTF with  $R = 2$  (because we know  $R = 2$  is  
 174 enough because of eq. (3)) to data sets 1 and 2, we realized that it is rare  
 175 that CMTF converges to global minimum when starting from initial values,  
 176  $U^{(i)}, U^{(j)}, U^{(k)}, \mathbf{a}^{(i)}, \mathbf{a}^{(j)}, \mathbf{a}^{(k)}$ , drawn from  $\mathcal{N}(\mu, \sigma)$  where  $\mathcal{N}(\mu, \sigma)$  is normal dis-  
 177 tribution having mean of  $\mu$  and standard deviation of  $\sigma$ . After trying several  
 178 tens of ninital values, we got the results shown in Figs. 6 and 7. It is obvious  
 179 that CMTF performed quite well as far as it converges.  $\mathbf{u}_1^{(i)}, \mathbf{u}_1^{(j)}, \mathbf{u}_1^{(k)}$ , (Figs.  
 180 6(A) and 7(A)) correspond to  $\mathbf{v}$  (Fig. 1(A) and (C)) while  $\mathbf{u}_2^{(i)}, \mathbf{u}_2^{(j)}, \mathbf{u}_2^{(k)}$  (Figs.  
 181 6(B) and 7(B)), correspond to  $\mathbf{v}'$  (Fig. 1(B) and (D)) as expected. On the other  
 182 hand, it is problematic that CMTF rarely converges to global minimum. In order  
 183 to improve this points, we replaced ALS employed in CMTF with BFGS.

184 Now CMTF came to converge to global minimum (Figs. 8 and 9) with starting  
185 any initial values drawn from  $\mathcal{N}(0, 1)$  as long as we tried. Thus, we decided to  
186 apply CMTF with replacing ALS with BFGS.

187 Although CMTF looks the best method to apply, CMTF has one problem:  
188 cpu time required to perform CMTF. Table 1 shows the list of cpu time required  
189 when various methods are applied to data set 1 and 2. It is obvious that  
190 HOSVD is the fastest since it does not require any iterations. CP decomposition  
191 is a bit slower than HOSVD, since it requires ALS to converge. CMTF is  
192 much more slower no matter which methods, ALS or BFGS, are employed for  
193 the minimization. As far as we deal with small data set, this difference is not  
194 critical. Nevertheless, when we have to deal with massive data set, this difference  
195 is critical. Although CMTF is slower than HOSVD by only several hundreds  
196 times, this difference is generally enhanced when the data set becomes larger.  
197 Since cpu time required for HOSVD also increases as data set grows, it might  
198 be unrealistic to perform CMTF for much larger data set.

199 Before applying TDs to real data set, we summarize the results here.

- 200 • HOSVD is the fastest and its outcome is not affected by the type of data  
201 set much. Nevertheless, because of requirement of orthogonality, it has  
202 less ability to derive the structure of original data set, eq. (3), if the  
203 vectors used to generate tensor are not orthogonal to each other.
- 204 • CP decomposition is the second fastest method and can reproduce the  
205 structure of original data set, eq. (3) (Fig. 4). Nonetheless, CP decom-  
206 position might fail dependent upon data set (Fig. 5).
- 207 • The original CMTF can successfully reproduce the data structure, eq. (3).  
208 On the other hand, it is the slowest method and requires to search initial  
209 values that converges to global minimum.
- 210 • With replacing ALS with BFGS, CMTF comes to converge to global min-  
211 imum independent of initial values. In spite of the acceleration with this  
212 replacement, CMTF is still much slower than HOSVD as well as CP de-  
213 composition.

214 Based upon the observation in the above, since data set we have to analyze  
215 is massive, considering primarily the cpu time required, we decided to employ  
216 HOSVD first. Then we will try other methods only when HOSVD fails to get  
217 reasonable results.

218 In order to apply the methods to more realistic cases, we added noise to  $x_{ijk}$ .  
219 According to the results in the Supplementary file, the summary is as follows:

- 220 • HOSVD is least affected by adding noise (Figs. S1 and S2). This is be-  
221 cause of the following reason. HOSVD generated two  $\mathbf{u}_\ell$ s (Fig. 2(A) and  
222 (B), 3(A) and (B)), which correspond to those with larger and smaller am-  
223 plitudes, respectively, because of the requirement of orthogonality. Then  
224  $\mathbf{u}_\ell$ s with larger amplitude remained unchanged (Figs. S1(A) and S2(A)).  
225 As a result, correspondence between  $x_{ijk}$  and the reconstruction (Figs.  
226 S1(C) and S2(C)) remained relatively accurate.

- 227 • For CP decomposition, adding noise destroyed the tiny difference among  
228  $\mathbf{u}_\ell$ s (Fig. 4 (A) and (B), Fig. 5 (A), (B) and (C)). Then the CP decompo-  
229 sition could detect only one valid  $\mathbf{u}_\ell$  (Figs. S3(A) and S4(B)). As a result,  
230 the obtained  $\mathbf{u}_\ell$  do not look better than those obtained by HOSVD (Figs.  
231 S1(A) and S2(A)). Then advantages of CP decomposition over HOSVD,  
232 which exist when noise free data set is considered, were lost.
- 233 • Original CMTF failed to converge, since adding noise disrupted computa-  
234 tion of gradient that is required to update the  $\mathbf{u}_\ell$  by ALS.
- 235 • Although CMTF with replacing ALS with BFGS still converged (Figs. S5  
236 and S6), it was impossible to see which  $\mathbf{u}_\ell$  converged correctly, because  
237 the converged solution has residuals due to adding noises. As a result, the  
238 converged  $\mathbf{u}_\ell$  (Figs. S5(A) and S6(B)) do not look better than those for  
239 HOSVD (Figs. S1(A) and S2(A)). The correspondence between  $x_{ijk}$  and  
240 the reconstruction (Figs. S5(D) and S6(D)) even became worst among  
241 methods tested. The advantages over HOSVD, which exist when noise  
242 free data set is considered, were lost as for CP decomposition.

243 In conclusion, adding noise, which is supposed to be closer to a realistic situation,  
244 added more advantages to HOSVD than other methods.

### 245 3.2 Application of HOSVD to real data set

246 Among numerous neurodegenerative diseases, we focus on Alzheimer’s disease  
247 (AD) in this study, because it is the diseases for which the most number of drugs  
248 were tried to develop. For example, among 322 drugs that target neurodegen-  
249 erative diseases, as many as 92 drugs targeted AD [24]. The therapy targets  
250 of AD are wide ranged; especially, Amyloid protein was most frequent target  
251 (12 among 92 drugs target amyloid), because accumulation of amyloid has ever  
252 been believed to be a primary cause of AD.

253 For this purpose, we selected one specific scRNA-seq data set, GSE127891,  
254 by which we can demonstrate the effectiveness of our proposed method. When  
255 selecting genes using TD based unsupervised FE, we first need to specify what  
256 kind of properties of gene expression we consider. In this study, we require the  
257 followings.

- 258 1. Gene expression should be independent of cells within the same 96 wells  
259 plate.
- 260 2. Gene expression should be independent of genotype.
- 261 3. Gene expression should be independent of tissues.
- 262 4. Gene expression should have monotonic dependence upon age.
- 263 5. Gene expression should be independent of sex.
- 264 6. Gene expression should be independent of each of four 96 wells plates  
265 under the same conditions.



266 In other words, we try to select genes with the most robust monotonic age  
267 dependence as much as possible. The reason of this motivation is as follows.  
268 In the paper where data set analyzed here was investigated originally, Frigerio  
269 et al. [25] found that age is the primary factor of the microglia response to  
270 accumulation of A $\beta$  plaques. We found that singular value vectors with  $\ell_1 =$   
271  $\ell_2 = \ell_3 = \ell_5 = \ell_6 = 1$  represent independence of cells, genotypes, tissues, sex  
272 and plates (Figure 10 (A), (B), (C), (E), (F)). On the other hand,  $u_{2j_4}$  represents  
273 monotonic dependence upon ages,  $1 \leq j_4 \leq 4$  (Figure 10 (D)).

274 Next, we need to find the  $G(1, 1, 1, 2, 1, 1, \ell_7)$  with the largest absolute value  
275 in order to identify singular value vector,  $u_{\ell_7 i}$ , attributed to genes. Then we  
276 found that  $G(1, 1, 1, 2, 1, 1, 2)$  has the largest absolute value. Therefore, we  
277 decided to use  $u_{2i}$  for attributing  $P$ -values to genes as shown in eq. (2). Finally,  
278 401 genes are identified as being associated with adjusted  $P$ -values less than 0.01  
279 (The list of genes is available as supplementary material).

280 These 401 genes are uploaded to Enrichr to identify the compounds, with  
281 which genes expressing differential expression of cell lines treated are maximally  
282 overlapped with these 401 genes. As for “LINCS L1000 Chem Pert up” category  
283 (Table 2, full list is available as supplementary material), the top ranked  
284 compound is alvocidib, which was previously tested for AD [26]; there are also  
285 65 experiments (see supplementary material) of cell lines treated with alvocidib  
286 and associated with adjusted  $P$ -value less than 0.05. The second top ranked  
287 compound is AZD-8055, which was also previously tested for AD [27]; there  
288 are also 6 experiments (see supplementary material) of cell lines treated with  
289 AZD-8055 and associated with adjusted  $P$ -value less than 0.05.

290 One might wonder if this is an accidental agreement which is specific to  
291 LINCS data set. In order to confirm that it is not an accidental agreement, we  
292 also see DrugMatrix category (Table 3, full list is available as supplementary  
293 material). The top, fifth and tenth ranked compound is cyclosporin-A, which  
294 was also previously tested for AD [28]; there are also 57 experiments (see supple-  
295 mentary material) of cell lines treated with cyclosporin-A and associated with  
296 adjusted  $P$ -value less than 0.05. Finally, we tested “Drug Perturbations from  
297 GEO up” category in Enrichr (Table 4, full list is available as supplementary  
298 material). The top ranked compounds is imatinib, which was also previously  
299 tested for AD [29]; there are also 18 experiments (see supplementary material) of  
300 cell lines treated with imatinib and associated with adjusted  $P$ -value less than  
301 0.05.

302 In order to check if the results are relatively independent of threshold ad-  
303 justed  $P$ -value, we also checked two additional threshold  $P$ -values, 0.005 and  
304 0.05 (See Table 5). Although the threshold adjusted  $P$ -values less than 0.01  
305 is the best, other two choices achieve almost similar performance. Thus, the  
306 performance achieved seems to be robust.

307 Although these findings suggest that our strategy is effective to find com-  
308 pounds that can be used for AD treatment, one might think that these findings  
309 are still weak. Since these 401 genes are simply genes whose expression is altered  
310 because of Amyloid accumulation, they themselves are unlikely to be disease caus-  
311 ing genes. Thus we consider regulation factors that affect expression of these

312 genes. At first, we consider transcription factor (TF). With checking “ENCODE  
313 and ChEA Consensus TFs from ChIP-X” category in Enrichr, we found that  
314 the target genes of TFs, MYC, NELFE, TAF7, KAT2A, SPI1, RELA, TAF1  
315 and PML are top ranked ten TFs associated with adjusted  $P$ -values less than  
316  $1 \times 10^{-7}$  (They are less than ten, because some are ranked in multiple times  
317 within top 10). Among them, MYC [30], KAT2A [31], SPI1 [32], RELA [33],  
318 TAF1 [34], and PML [35] were reported to be related to AD. These TFs were  
319 also identified within top ranked 10 TFs, with other two additional threshold  
320  $P$ -values, less than 0.005 and 0.05, with similar associated adjusted  $P$ -values;  
321 no additional TFs were ranked within top 10.

322 Next we consider microRNA (miRNA) as regulatory factors towards identified  
323 401 genes. With checking “miRTarBase 2017” category in Enrichr, we  
324 found that target genes of miRNAs, hsa-miR-320a, hsa-miR-1260b, hsa-miR-  
325 652-3p, hsa-miR-744-5p, hsa-miR-16-5p, hsa-miR-100-5p, hsa-miR-615-3p, hsa-  
326 miR-484, hsa-miR-296-3p, and hsa-miR-423-5p are top ranked ten miRNAs as-  
327 sociated with adjusted  $P$ -values less than  $1 \times 10^{-3}$ . Among them, miR-320a [36],  
328 miR-652 [37], miR-744 [38], miR-16 [39], miR-100 [40], miR-615 [41], miR-  
329 484 [42], miR-296 [43], and miR-423 [36] were reported to be related to AD.  
330 As for additional two threshold adjusted  $P$ -values, all are ranked within top 10  
331 for adjusted  $P$ -values less than 0.05 while eight out of ten excluding miR-615-3p  
332 and miR-296-3p are ranked within top 10. Thus, it also shows a robust result.

333 These finding can add more confidence that identified 401 genes are likely  
334 related to AD. Expression of these 401 genes might be altered because they  
335 are simply downstream genes caused by AD, it is unlikely to find more direct  
336 evidence that these genes really contribute to AD directly. For our purpose,  
337 screening drugs with gene expression, 401 genes are enough to be downstream  
338 genes caused by AD. Thus, we do not investigate biological background of these  
339 401 genes further.

340 Thus, it might be worthwhile investigating lower ranked compounds in Ta-  
341 bles 2, 3 and 4 as candidate compounds for AD, even if they were not known  
342 drugs for AD.

## 343 4 Discussion

344 First of all, since these cell lines in Table 2 are originated in human, our strategy  
345 can provide us the opportunity to check if proposed candidate drugs screened  
346 with model animals are also effective in human.

347 It is also remarkable that we do not need gene expression of all genes, but  
348 only a subset of genes (please remember that LINCS project measures only gene  
349 expression of less than one thousand genes) in order to predict candidate drugs  
350 with high accuracy. This might reduce the amount of money to screen numerous  
351 number of compounds.

352 Our method is also applicable to scRNA-seq in order to screen drug com-  
353 pounds candidate from scRNA-seq. To our knowledge, there are very limited  
354 number of studies that relate scRNA-seq to drug design [44,45], since scRNA-seq

355 usually lacks cell labeling which is useful to screen differentially expressed genes.  
356 In this study, we simply make use of ages, which is not always directly related to  
357 diseases. In spite of that, drug we listed was correct, i.e., they are known drugs  
358 to some extent. Therefore, our strategy is also useful to add an alternative one  
359 along this direction, i.e., making use of scRNA-seq for drug design.

360 Thus, our strategy, TD based unsupervised FE, might be promising method-  
361 ology to screen drug candidate compounds.

362 One might wonder why we have specifically used HOSVD algorithm although  
363 there are many other ways by which we can apply TD to data set. There are  
364 multiple reasons why we did not employ other TD based approaches. First of all,  
365 we would like to compare HOSVD with other simple (unsupervised) TDs, CP  
366 decomposition, HOOI for Tucker decomposition and tensor train decomposition.  
367 CP decomposition is the much more popular methods because it can relate  
368 singular value vectors one to one. In HOSVD algorithm, we need to investigate  
369 core tensor,  $G$ , for relating sigular value vectors attributed to genes an those  
370 attributed to individual cells. In CP decomposition, since TD is composed of  
371 outer product of individual singular value vectors, it is clear which singular value  
372 vectors attributed to genes are associated with selected singular value vectors  
373 attributed to cells. Nevertheless, CP decomposition has two disadvantages:  
374 massive computational time and the lack of guarantee that converges to unique  
375 solutions. Since CP decomposition employed alternative least square (ALS), it  
376 needs to initial values of singular value vectors, which often converges to distinct  
377 final singular value vectors. This results in distinct set of genes selected, since  
378 we make use of singular value vectors attributed to genes in order to select genes.  
379 It definitely prevents us from interpreting biological meanings that should be  
380 independent of numerical initial values. The employment of ALS also results  
381 in the lack of estimated computational time, since it is iterative procedure.  
382 Especially when we need to deal with massive data set that require huge cpu  
383 time in each iteration, it is not a good strategy to employ the method that  
384 requires iterative processes that we cannot estimate the cpu time require by  
385 it in advance. On the other hand, HOSVD is essentially SVD of unfolded  
386 tensor, thus it does not require any iterative computation; it is guaranteed to  
387 converge within polynomial time. Since we could get reasonable results using  
388 HOSVD, we have no motivation to employ the method that requires iteration  
389 like CP decomposition. As for HOOI, since it also employed ALS, it is not  
390 recommended to employ for the massive data set that we analyzed in this study.  
391 Especially, since it is very usual that HOOI employs the results of HOSVD as  
392 initial (starting) values for the iteration, there are no reasons to apply HOOI to  
393 the results of HOSVD that is good enough in this study. Finally, as for tensor  
394 train decomposition, it does lack the weight factor that relates between singular  
395 value vectors attributed to gene and cells. Since we definitely need to relate  
396 them for our purpose, tensor train decomposition is not a suitable method,  
397 either. All of these point about the comparisons between HOSVD and other  
398 TDs from the point of views of feature selection was discussed in more details  
399 in the book [9] to be published soon.

400 After that, we would like to discuss why we do not employ more advanced

401 supervised methods. In the above analysis, we made use of labeling informa-  
402 tion, e.g., sex, genotypes, and time points, only after TD was applied to data  
403 set. On the other hand, there are multiple methods that can make use of la-  
404 beling information with applying TD. For example, coupled matrix and tensor  
405 factorization (CMTF) [23] is a straight extension of unsupervised TD to su-  
406 pervised one. CMTF requires that linear combination of singular value vectors  
407 must be coincident with given labeling attributed to samples (in this study,  
408 cells). Although it is generally expected that CMTF can derive singular value  
409 vectors that are more associated with labeling than fully unsupervised TDs do,  
410 only one obstacle to perform CMTF is cpu time. Since CMTF requires iterative  
411 optimization to fulfill the requirements, i.e., linear combination of singular value  
412 vectors must be coincident with given labeling attributed to sample, CMTF re-  
413 quires more computational time than unsupervised TD including HOSVD do.  
414 Practically, CMTF requires as many as hundreds iterations, each of which re-  
415 quires cpu time as much as HOSVD requires. This means, CMTF takes as  
416 many as hundreds times longer than HOSVD. In this case, since data set is  
417 so massive, single HOSVD requires several hours run on computer, Although  
418 we tried to implement CMTF fitted to our model and to execute it, it does  
419 not converge within a day. Since our TD based unsupervised FE has already  
420 achieved reasonable results we concluded that performing more advanced su-  
421 pervised methods that usually require more cputime is not effective and did not  
422 employ any supervised method including CMTF.

## 423 5 Conclusion and Future Work

424 In this paper, we applied TD based unsupervised FE to scRNA-seq taken from  
425 mouse brain with  $A\beta$  accumulation. We have compared selected 401 genes  
426 with differentially expressed genes in cell lines and model animals treated with  
427 various compounds. As a result, as for three independent data sets, LINCS,  
428 DrugMatrix and GEO, top ranked compounds are reported to be tested as AD  
429 treatment. This suggests the effectiveness of our strategy and lower ranked  
430 compounds should be tested as promising drug compounds candidates. To our  
431 knowledge, this is the first successful one that can be applied to scRNA-seq in  
432 order to identify drug compounds candidate.

433 For future work, we aim to (1) utilize the tensor decomposition technique  
434 in the transfer learning setting to identify effective drugs between target and  
435 related tasks in various problems in the clinical informatics domain, among other  
436 uses; (2) add other data source of different diseases (e.g., Parkinson's disease)  
437 for treatment validation; and (3) apply the tensor decomposition technique in  
438 more fields such as social networks to verify its effectiveness in applications such  
439 as recommender systems.

## 440 6 Acknowledgement

441 This project was funded by the Deanship of Scientific Research (DSR) at King  
442 Abdulaziz University, Jeddah, under grant no. KEP-8-611-38. The authors,  
443 therefore, acknowledge with thanks DSR for technical and financial support.

444 This paper was also funded by KAKENHI 19H05270 and 17K00417.

## References

- [1] Gribkoff VK, Kaczmarek LK. The need for new approaches in CNS drug discovery: Why drugs have failed, and what can be done to improve outcomes. *Neuropharmacology*. 2017;120:11 – 19. Beyond Small Molecules for Neurological Disorders.
- [2] Ransohoff RM. All (animal) models (of neurodegeneration) are wrong. Are they also useful? *Journal of Experimental Medicine*. 2018;215(12):2955–2958.
- [3] Gordon J, Amini S, White MK. In: Amini S, White MK, editors. *General Overview of Neuronal Cell Culture*. Totowa, NJ: Humana Press; 2013. p. 1–8.
- [4] Habib R, Noreen N, Nadeem N. Decoding Common Features of Neurodegenerative Disorders: From Differentially Expressed Genes to Pathways. *Current Genomics*. 2018;19(4):300–312.
- [5] Avsec Ž, Kreuzhuber R, Israeli J, Xu N, Cheng J, Shrikumar A, et al. The Kipoi repository accelerates community exchange and reuse of predictive models for genomics. *Nature biotechnology*. 2019;p. 1.
- [6] Badrinarayanan V, Kendall A, Cipolla R. Segnet: A deep convolutional encoder-decoder architecture for image segmentation. *IEEE transactions on pattern analysis and machine intelligence*. 2017;39(12):2481–2495.
- [7] Mehdipour Ghazi M, Kemal Ekenel H. A comprehensive analysis of deep learning based representation for face recognition. In: *Proceedings of the IEEE conference on computer vision and pattern recognition workshops*; 2016. p. 34–41.
- [8] Taguchi Y. Multiomics Data Analysis Using Tensor Decomposition Based Unsupervised Feature Extraction. In: *Intelligent Computing Theories and Application*. Springer International Publishing; 2019. p. 565–574. Available from: [https://doi.org/10.1007/978-3-030-26763-6\\_54](https://doi.org/10.1007/978-3-030-26763-6_54).
- [9] Taguchi YH. Unsupervised Feature Extraction Applied to Bioinformatics: A PCA Based and TD Based Approach. *Unsupervised and Semi-Supervised Learning*. Springer International Publishing; 2019. In press.

- [10] Taguchi Yh. Drug candidate identification based on gene expression of treated cells using tensor decomposition-based unsupervised feature extraction for large-scale data. *BMC Bioinformatics*. 2019 Feb;19(13):388.
- [11] Taguchi YH, Ng KL. Tensor Decomposition-Based Unsupervised Feature Extraction for Integrated Analysis of TCGA Data on MicroRNA Expression and Promoter Methylation of Genes in Ovarian Cancer. In: 2018 IEEE 18th International Conference on Bioinformatics and Bioengineering (BIBE); 2018. p. 195–200.
- [12] Taguchi YH. Tensor Decomposition-Based Unsupervised Feature Extraction Can Identify the Universal Nature of Sequence-Nonspecific Off-Target Regulation of mRNA Mediated by MicroRNA Transfection. *Cells*. 2018;7(6):54.
- [13] Taguchi YH. Tensor decomposition/principal component analysis based unsupervised feature extraction applied to brain gene expression and methylation profiles of social insects with multiple castes. *BMC Bioinformatics*. 2018;19(Suppl 4):99.
- [14] Taguchi YH. One-class Differential Expression Analysis using Tensor Decomposition-based Unsupervised Feature Extraction Applied to Integrated Analysis of Multiple Omics Data from 26 Lung Adenocarcinoma Cell Lines. In: 2017 IEEE 17th International Conference on Bioinformatics and Bioengineering (BIBE); 2017. p. 131–138.
- [15] Taguchi YH. Tensor decomposition-based unsupervised feature extraction applied to matrix products for multi-view data processing. *PLoS ONE*. 2017;12(8):e0183933.
- [16] Taguchi YH. Identification of candidate drugs using tensor-decomposition-based unsupervised feature extraction in integrated analysis of gene expression between diseases and DrugMatrix datasets. *Sci Rep*. 2017;7(1):13733.
- [17] Taguchi YH. Tensor decomposition-based unsupervised feature extraction identifies candidate genes that induce post-traumatic stress disorder-mediated heart diseases. *BMC Med Genomics*. 2017;10(Suppl 4):67.
- [18] Taguchi YH. Identification of Candidate Drugs for Heart Failure Using Tensor Decomposition-Based Unsupervised Feature Extraction Applied to Integrated Analysis of Gene Expression Between Heart Failure and Drug-Matrix Datasets. In: *Intelligent Computing Theories and Application*. Springer International Publishing; 2017. p. 517–528.
- [19] Benjamini Y, Hochberg Y. Controlling the False Discovery Rate: A Practical and Powerful Approach to Multiple Testing. *Journal of the Royal Statistical Society Series B (Methodological)*. 1995;57(1):289–300.

- [20] Kuleshov MV, Jones MR, Rouillard AD, Fernandez NF, Duan Q, Wang Z, et al. Enrichr: a comprehensive gene set enrichment analysis web server 2016 update. *Nucleic Acids Research*. 2016 05;44(W1):W90–W97.
- [21] Kolda TG, Bader BW. Tensor decompositions and applications. *SIAM review*. 2009;51(3):455–500.
- [22] Hore V, Viñuela A, Buil A, Knight J, McCarthy MI, Small K, et al. Tensor decomposition for multiple-tissue gene expression experiments. *Nature genetics*. 2016;48(9):1094.
- [23] Acar E, Rasmussen MA, Savorani F, Næs T, Bro R. Understanding data fusion within the framework of coupled matrix and tensor factorizations. *Chemometrics and Intelligent Laboratory Systems*. 2013;129:53 – 63. *Multway and Multiset Methods*. Available from: <http://www.sciencedirect.com/science/article/pii/S0169743913001226>.
- [24] Fischer F, Matthisson M, Herrling P. List of Drugs in Development for Neurodegenerative Diseases. *Neurodegenerative Diseases*. 2004;1(1):50–70. Available from: <https://doi.org/10.1159/2F000077879>.
- [25] Frigerio CS, Wolfs L, Fattorelli N, Thrupp N, Voytyuk I, Schmidt I, et al. The Major Risk Factors for Alzheimer’s Disease: Age, Sex, and Genes Modulate the Microglia Response to A $\beta$  Plaques. *Cell Reports*. 2019;27(4):1293 – 1306.e6.
- [26] Leggio GM, Catania MV, Puzzo D, Spatuzza M, Pellitteri R, Gulisano W, et al. The antineoplastic drug flavopiridol reverses memory impairment induced by Amyloid $\beta_{1-42}$  oligomers in mice. *Pharmacological Research*. 2016;106:10 – 20.
- [27] Hein LK, Apaja PM, Hattersley K, Grose RH, Xie J, Proud CG, et al. A novel fluorescent probe reveals starvation controls the commitment of amyloid precursor protein to the lysosome. *Biochimica et Biophysica Acta (BBA) - Molecular Cell Research*. 2017;1864(10):1554 – 1565.
- [28] Heuvel CVD, Donkin JJ, Finnie JW, Blumbergs PC, Kuchel T, Koszyca B, et al. Downregulation of Amyloid Precursor Protein (APP) Expression following Post-Traumatic Cyclosporin-A Administration. *Journal of Neurotrauma*. 2004;21(11):1562–1572. PMID: 15684649.
- [29] Eisele YS, Baumann M, Klebl B, Nordhammer C, Jucker M, Kilger E. Gleevec Increases Levels of the Amyloid Precursor Protein Intracellular Domain and of the Amyloid-egrading Enzyme Nephilysin. *Molecular Biology of the Cell*. 2007;18(9):3591–3600. PMID: 17626163.
- [30] Ferrer I, Blanco R. N-myc and c-myc expression in Alzheimer disease, Huntington disease and Parkinson disease. *Molecular Brain Research*. 2000;77(2):270 – 276. Available from: <http://www.sciencedirect.com/science/article/pii/S0169328X00000620>.



- [31] Kerimoglu C, Sakib MS, Jain G, Benito E, Burkhardt S, Capece V, et al. KMT2A and KMT2B Mediate Memory Function by Affecting Distinct Genomic Regions. *Cell Reports*. 2017;20(3):538 – 548. Available from: <http://www.sciencedirect.com/science/article/pii/S2211124717309038>.
- [32] Huang KL, Marcora E, Pimenova AA, Di Narzo AF, Kapoor M, Jin SC, et al. A common haplotype lowers PU.1 expression in myeloid cells and delays onset of Alzheimer’s disease. *Nat Neurosci*. 2017 Aug;20(8):1052–1061.
- [33] Chen CH, Zhou W, Liu S, Deng Y, Cai F, Tone M, et al. Increased NF- $\kappa$ B signalling up-regulates BACE1 expression and its therapeutic potential in Alzheimer’s disease. *International Journal of Neuropsychopharmacology*. 2012 02;15(1):77–90. Available from: <https://doi.org/10.1017/S1461145711000149>.
- [34] Muller U, Herzfeld T, Nolte D. The TAF1/DYT3 multiple transcript system in X-linked dystonia-parkinsonism. *Am J Hum Genet*. 2007 Aug;81(2):415–417.
- [35] Kelleher MB, Galutira D, Duggan TD, Nuovo GJ. Progressive multifocal leukoencephalopathy in a patient with Alzheimer’s disease. *Diagn Mol Pathol*. 1994 Jun;3(2):105–113.
- [36] Nagaraj S, Laskowska-Kaszub K, D’bski KJ, Wojsiat J, D’browski M, Gabryelewicz T, et al. Profile of 6 microRNA in blood plasma distinguish early stage Alzheimer’s disease patients from non-demented subjects. *Oncotarget*. 2017 Mar;8(10):16122–16143.
- [37] Wang LL, Min L, Guo QD, Zhang JX, Jiang HL, Shao S, et al. Profiling microRNA from Brain by Microarray in a Transgenic Mouse Model of Alzheimer’s Disease. *Biomed Res Int*. 2017;2017:8030369.
- [38] Burgos K, Malenica I, Metpally R, Courtright A, Rakela B, Beach T, et al. Profiles of Extracellular miRNA in Cerebrospinal Fluid and Serum from Patients with Alzheimer’s and Parkinson’s Diseases Correlate with Disease Status and Features of Pathology. *PLOS ONE*. 2014 05;9(5):1–20. Available from: <https://doi.org/10.1371/journal.pone.0094839>.
- [39] Zhang B, Chen CF, Wang AH, Lin QF. MiR-16 regulates cell death in Alzheimer’s disease by targeting amyloid precursor protein. *Eur Rev Med Pharmacol Sci*. 2015 Nov;19(21):4020–4027.
- [40] Hebert SS, Wang WX, Zhu Q, Nelson PT. A study of small RNAs from cerebral neocortex of pathology-verified Alzheimer’s disease, dementia with lewy bodies, hippocampal sclerosis, frontotemporal lobar dementia, and non-demented human controls. *J Alzheimers Dis*. 2013;35(2):335–348.



- [41] Liu QY, Chang MN, Lei JX, Koukiekolo R, Smith B, Zhang D, et al. Identification of microRNAs involved in Alzheimer’s progression using a rabbit model of the disease. *Am J Neurodegener Dis.* 2014;3(1):33–44.
- [42] Rani A, O’Shea A, Ianov L, Cohen RA, Woods AJ, Foster TC. miRNA in Circulating Microvesicles as Biomarkers for Age-Related Cognitive Decline. *Frontiers in Aging Neuroscience.* 2017;9:323. Available from: <https://www.frontiersin.org/article/10.3389/fnagi.2017.00323>.
- [43] Xie B, Zhou H, Zhang R, Song M, Yu L, Wang L, et al. Serum miR-206 and miR-132 as Potential Circulating Biomarkers for Mild Cognitive Impairment. *J Alzheimers Dis.* 2015;45(3):721–731.
- [44] Litzgenburger UM, Buenrostro JD, Wu B, Shen Y, Sheffield NC, Kathiria A, et al. Single-cell epigenomic variability reveals functional cancer heterogeneity. *Genome Biology.* 2017 Jan;18(1):15.
- [45] Yuan D, Tao Y, Chen G, Shi T. Systematic expression analysis of ligand-receptor pairs reveals important cell-to-cell interactions inside glioma. *Cell Communication and Signaling.* 2019 May;17(1):48.

|            | HOSVD | CP  | CMTF |      |
|------------|-------|-----|------|------|
|            |       |     | ALS  | BFGS |
| data set 1 | 22    | 334 | 5760 | 2002 |
| data set 2 | 9     | 123 | 5787 | 2991 |

Table 1: Cpu time (msec) required to perform various methods.

Table 2: Top ranked 10 compounds listed in “LINCS L1000 Chem Pert up” category in Enrichr. Overlap is that between selected 401 genes and genes selected in individual experiments.

| Term                             | Overlap | P-value                | Adjusted P-value       |
|----------------------------------|---------|------------------------|------------------------|
| LJP006_HCC515_24H-alvocidib-10   | 28/221  | $7.99 \times 10^{-15}$ | $2.21 \times 10^{-10}$ |
| LJP006_HCC515_24H-AZD-8055-10    | 24/188  | $5.87 \times 10^{-13}$ | $8.13 \times 10^{-9}$  |
| LJP009_PC3_24H-CGP-60474-3.33    | 25/217  | $1.99 \times 10^{-12}$ | $1.14 \times 10^{-8}$  |
| LJP005_MDAMB231_24H-AS-601245-10 | 20/132  | $2.05 \times 10^{-12}$ | $1.14 \times 10^{-8}$  |
| LJP009_PC3_24H-saracatinib-10    | 24/196  | $1.47 \times 10^{-12}$ | $1.14 \times 10^{-8}$  |
| LJP006_HCC515_24H-CGP-60474-0.37 | 24/225  | $2.89 \times 10^{-11}$ | $1.14 \times 10^{-7}$  |
| LJP009_PC3_24H-PF-3758309-10     | 23/212  | $5.33 \times 10^{-11}$ | $1.84 \times 10^{-7}$  |
| LJP005_HCC515_24H-WZ-3105-3.33   | 20/144  | $1.07 \times 10^{-11}$ | $4.95 \times 10^{-8}$  |
| LJP006_HEPG2_24H-AZD-5438-10     | 21/182  | $1.17 \times 10^{-10}$ | $3.24 \times 10^{-7}$  |
| LJP006_HCC515_24H-A443654-10     | 22/203  | $1.44 \times 10^{-10}$ | $3.62 \times 10^{-7}$  |

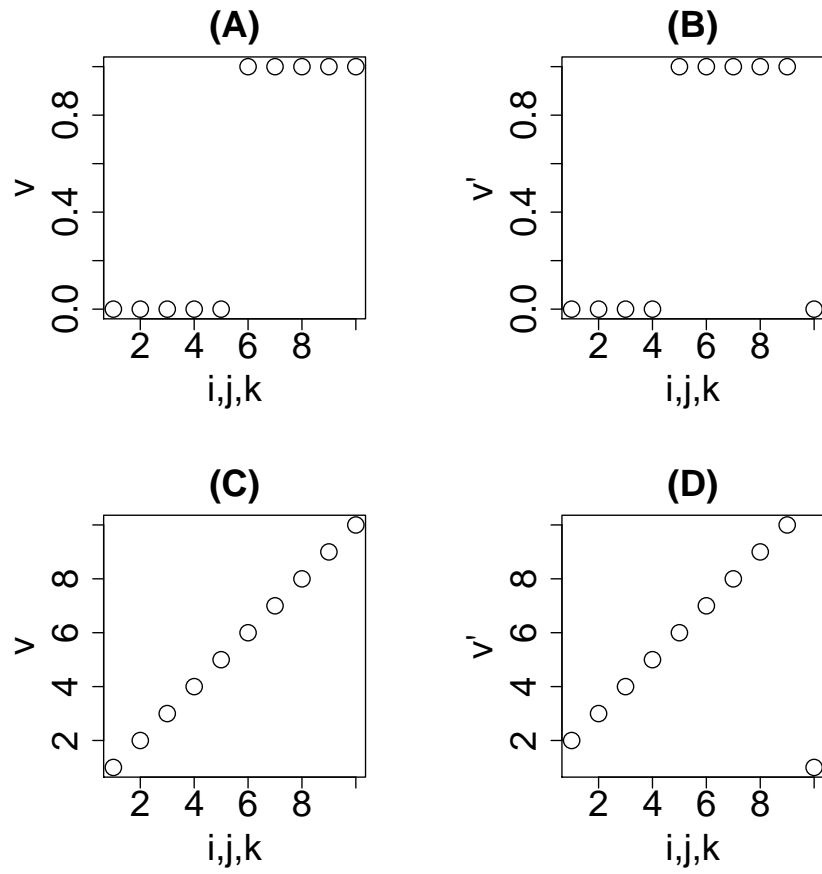

Figure 1: Data set 1, eq. (4), (A)  $v_i$  and (B)  $v'_i$  and data set 2, eq. (5), (C)  $v_i$  and (D)  $v'_i$ .

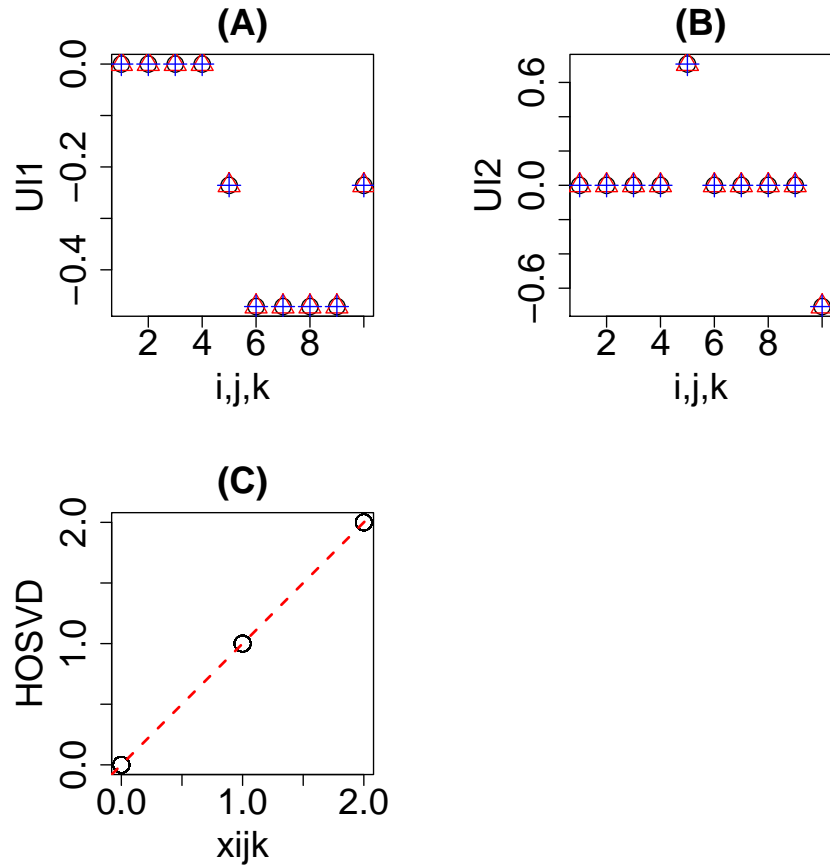

Figure 2: The results obtained by HOSVD applied to data set 1: eq. (4). (A) Open black circles:  $u_{1i}^{(i)}$ , open red triangles:  $u_{1j}^{(j)}$ , blue pluses:  $u_{1k}^{(k)}$  (B) Open black circles:  $u_{2i}^{(i)}$ , open red triangles:  $u_{2j}^{(j)}$ , blue pluses:  $u_{2k}^{(k)}$ . (C) Scatter plot between  $x_{ijk}$  (horizontal axis) and eq. (7) (vertical axis).

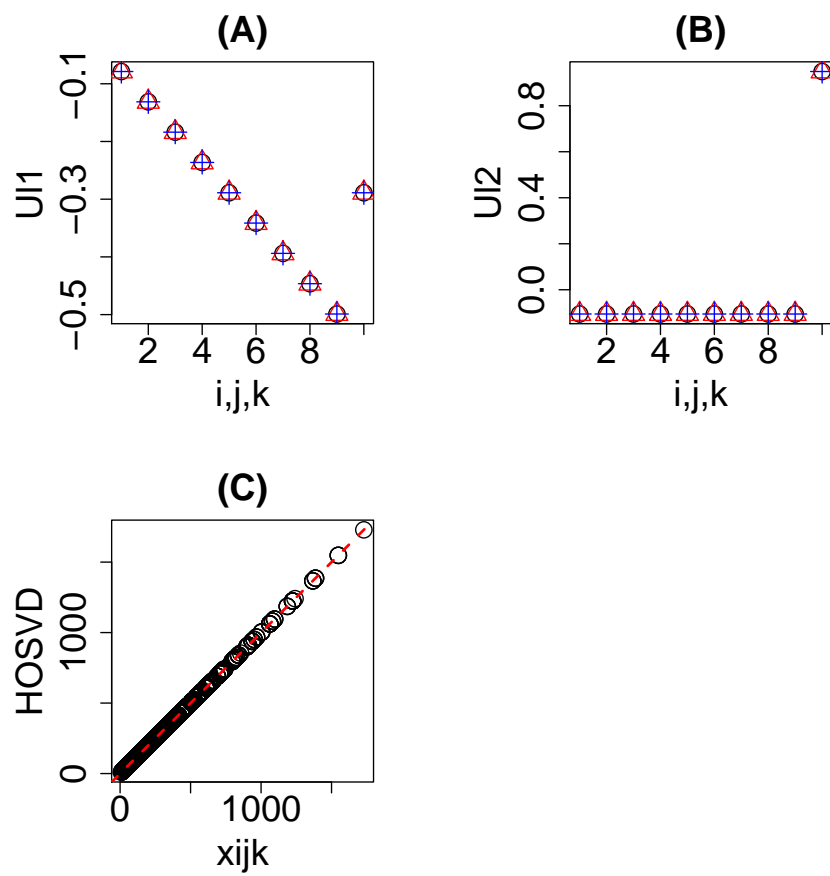

Figure 3: The results obtained by HOSVD applied to data set 2: eq. (5). Other notations are the same as Fig. 2.

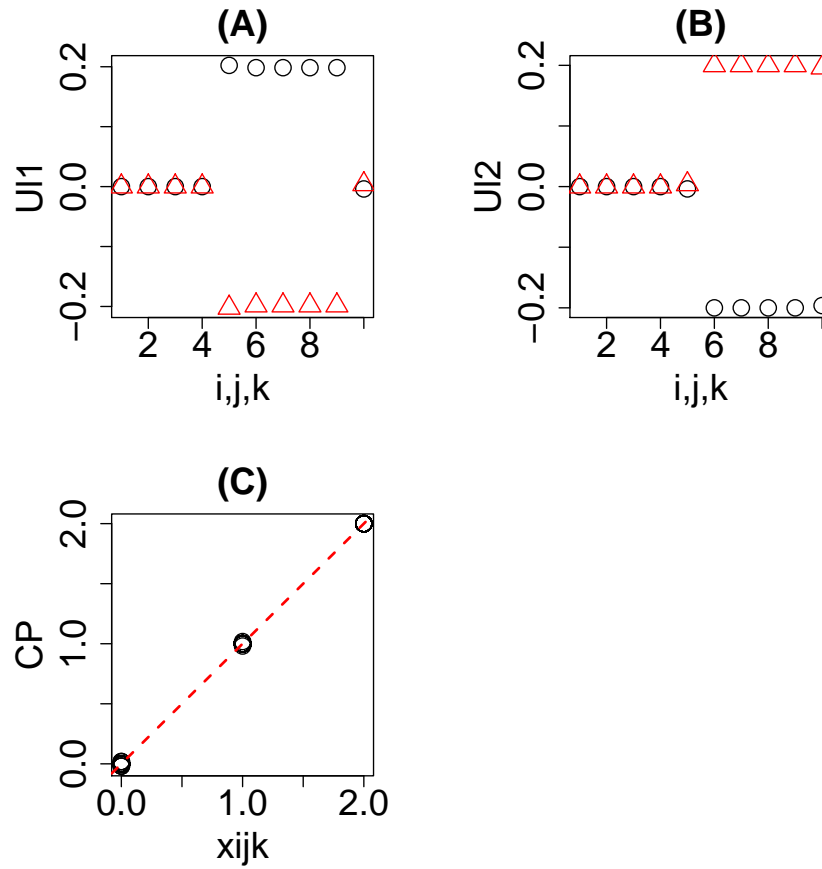

Figure 4: The results obtained by CP decomposition applied to data set 1: eq. (4). (A) Open black circles:  $u_{1i}^{(i)}$ , open red triangles:  $u_{1j}^{(j)}$ , blue pluses:  $u_{1k}^{(k)}$  (B) Open black circles:  $u_{2i}^{(i)}$ , open red triangles:  $u_{2j}^{(j)}$ , blue pluses:  $u_{2k}^{(k)}$ . (C) Scatter plot between  $x_{ijk}$  (horizontal axis) and those reproduced by CP decomposition using singular value vectors shown in (A) and (B) (vertical axis).

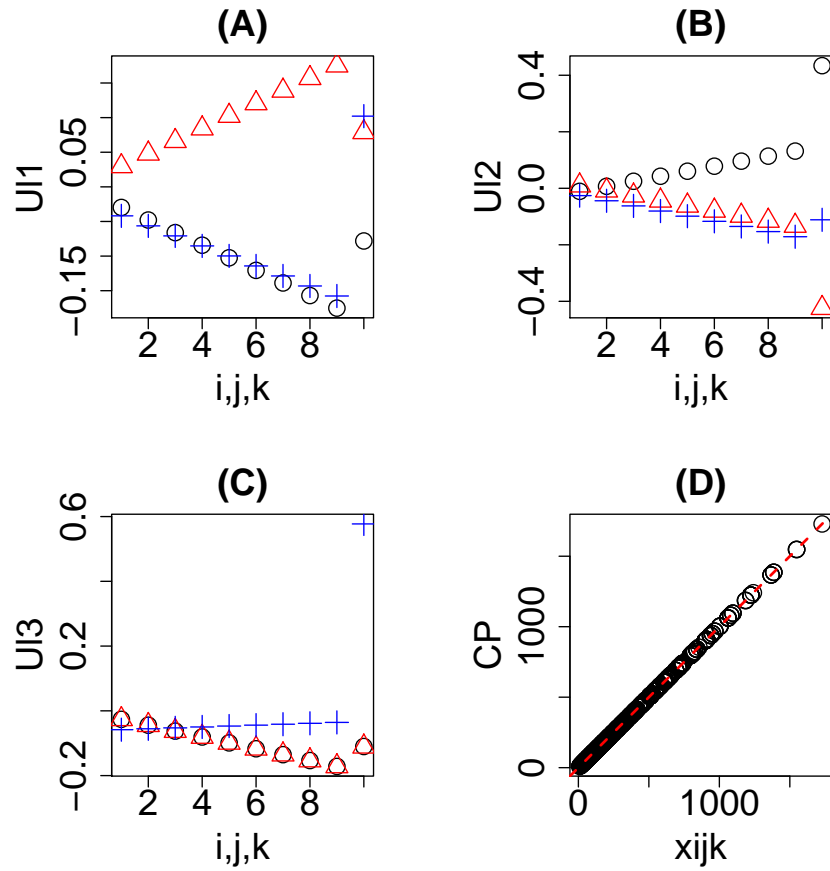

Figure 5: The results obtained by CP decomposition applied to data set 2: eq. (5). (A) Open black circles:  $u_{1i}^{(i)}$ , open red triangles:  $u_{1j}^{(j)}$ , blue pluses:  $u_{1k}^{(k)}$  (B) Open black circles:  $u_{2i}^{(i)}$ , open red triangles:  $u_{2j}^{(j)}$ , blue pluses:  $u_{2k}^{(k)}$ . (C) Open black circles:  $u_{3i}^{(i)}$ , open red triangles:  $u_{3j}^{(j)}$ , blue pluses:  $u_{3k}^{(k)}$ . (D) Scatter plot between  $x_{ijk}$  (horizontal axis) and those reproduced by CP decomposition using singular value vectors shown in (A), (B) and (C) (vertical axis).

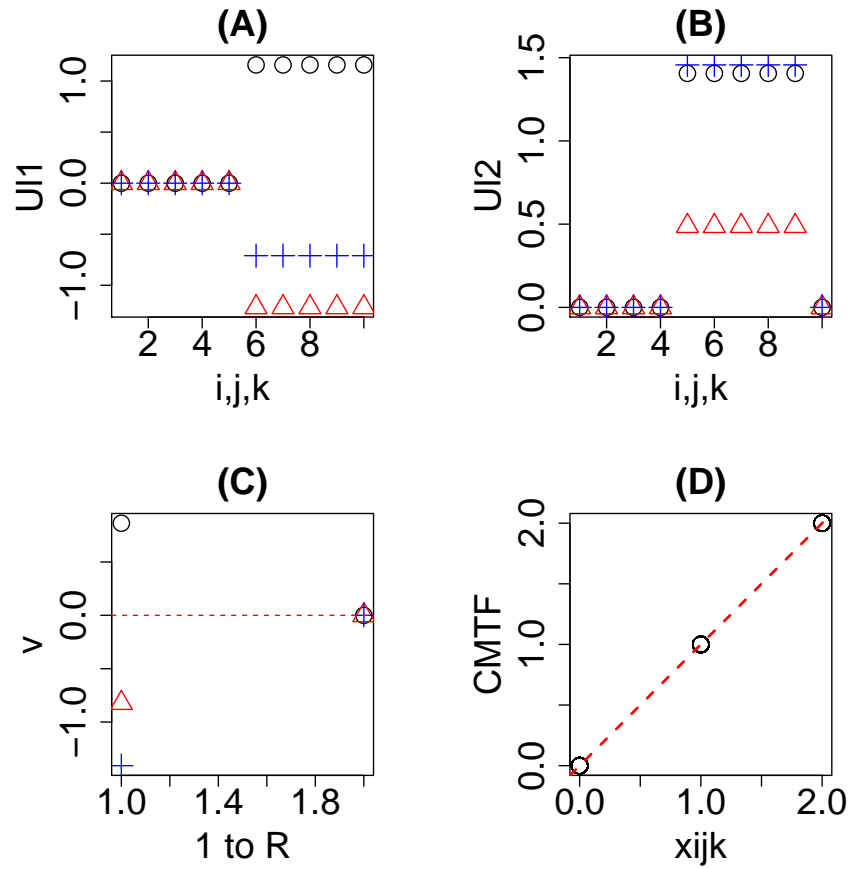

Figure 6: The results obtained by CMTF applied to data set 1: eq. (4). (A) Open black circles:  $u_{1i}^{(i)}$ , open red triangles:  $u_{1j}^{(j)}$ , blue pluses:  $u_{1k}^{(k)}$  (B) Open black circles:  $u_{2i}^{(i)}$ , open red triangles:  $u_{2j}^{(j)}$ , blue pluses:  $u_{2k}^{(k)}$ . (C) Open black circles:  $a_{\ell}^{(i)}$ , open red triangles:  $a_{\ell}^{(j)}$ , blue pluses:  $a_{\ell}^{(k)}$ . (D) Scatter plot between  $x_{ijk}$  (horizontal axis) and those reproduced by CMTF decomposition using singular value vectors shown in (A) and (B) (vertical axis).

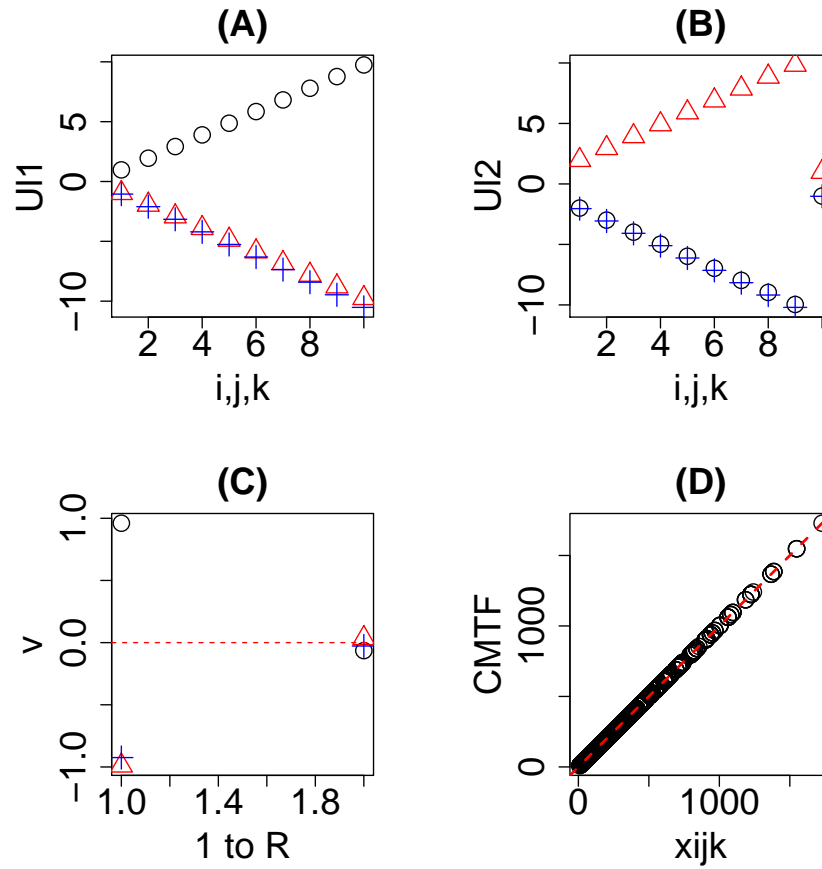

Figure 7: The results obtained by CMTF applied to data set 2: eq. (5). (A) Open black circles:  $u_{1i}^{(i)}$ , open red triangles:  $u_{1j}^{(j)}$ , blue pluses:  $u_{1k}^{(k)}$  (B) Open black circles:  $u_{2i}^{(i)}$ , open red triangles:  $u_{2j}^{(j)}$ , blue pluses:  $u_{2k}^{(k)}$ . (C) Open black circles:  $a_{\ell}^{(i)}$ , open red triangles:  $a_{\ell}^{(j)}$ , blue pluses:  $a_{\ell}^{(k)}$ . (D) Scatter plot between  $x_{ijk}$  (horizontal axis) and those reproduced by CMTF decomposition using singular value vectors shown in (A) and (B) (vertical axis).



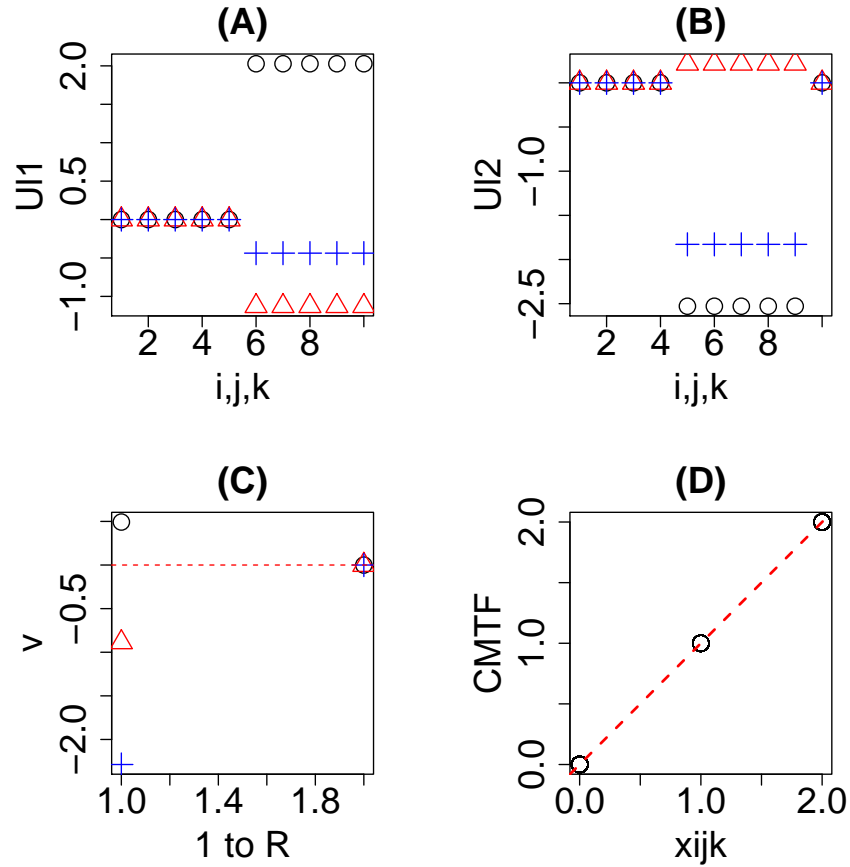

Figure 8: The results obtained by CMTF, with replacing ALS with BFGS, applied to data set 1: eq. (4). (A) Open black circles:  $u_{1i}^{(i)}$ , open red triangles:  $u_{1j}^{(j)}$ , blue pluses:  $u_{1k}^{(k)}$  (B) Open black circles:  $u_{2i}^{(i)}$ , open red triangles:  $u_{2j}^{(j)}$ , blue pluses:  $u_{2k}^{(k)}$ . (C) Open black circles:  $a_{\ell}^{(i)}$ , open red triangles:  $a_{\ell}^{(j)}$ , blue pluses:  $a_{\ell}^{(k)}$ . (D) Scatter plot between  $x_{ijk}$  (horizontal axis) and those reproduced by CMTF using singular value vectors shown in (A) and (B) (vertical axis).

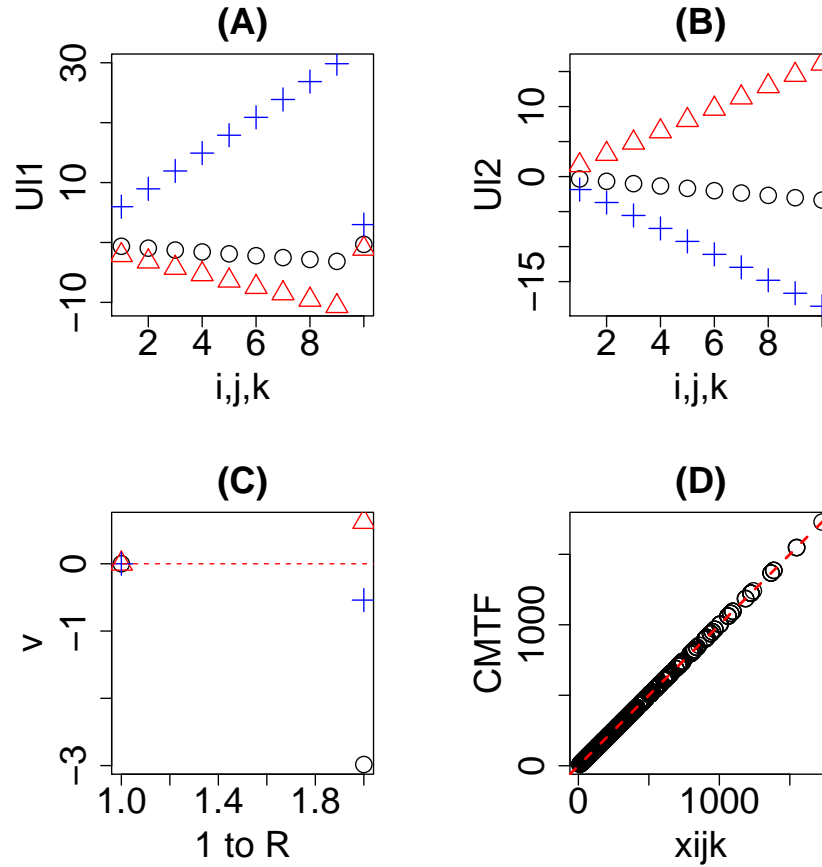

Figure 9: The results obtained by CMTF, with replacing ALS with BFGS, applied to data set 2: eq. (5). (A) Open black circles:  $u_{1i}^{(i)}$ , open red triangles:  $u_{1j}^{(j)}$ , blue pluses:  $u_{1k}^{(k)}$  (B) Open black circles:  $u_{2i}^{(i)}$ , open red triangles:  $u_{2j}^{(j)}$ , blue pluses:  $u_{2k}^{(k)}$ . (C) Open black circles:  $a_{\ell}^{(i)}$ , open red triangles:  $a_{\ell}^{(j)}$ , blue pluses:  $a_{\ell}^{(k)}$ . (D) Scatter plot between  $x_{ijk}$  (horizontal axis) and those reproduced by CMTF using singular value vectors shown in (A) and (B) (vertical axis).

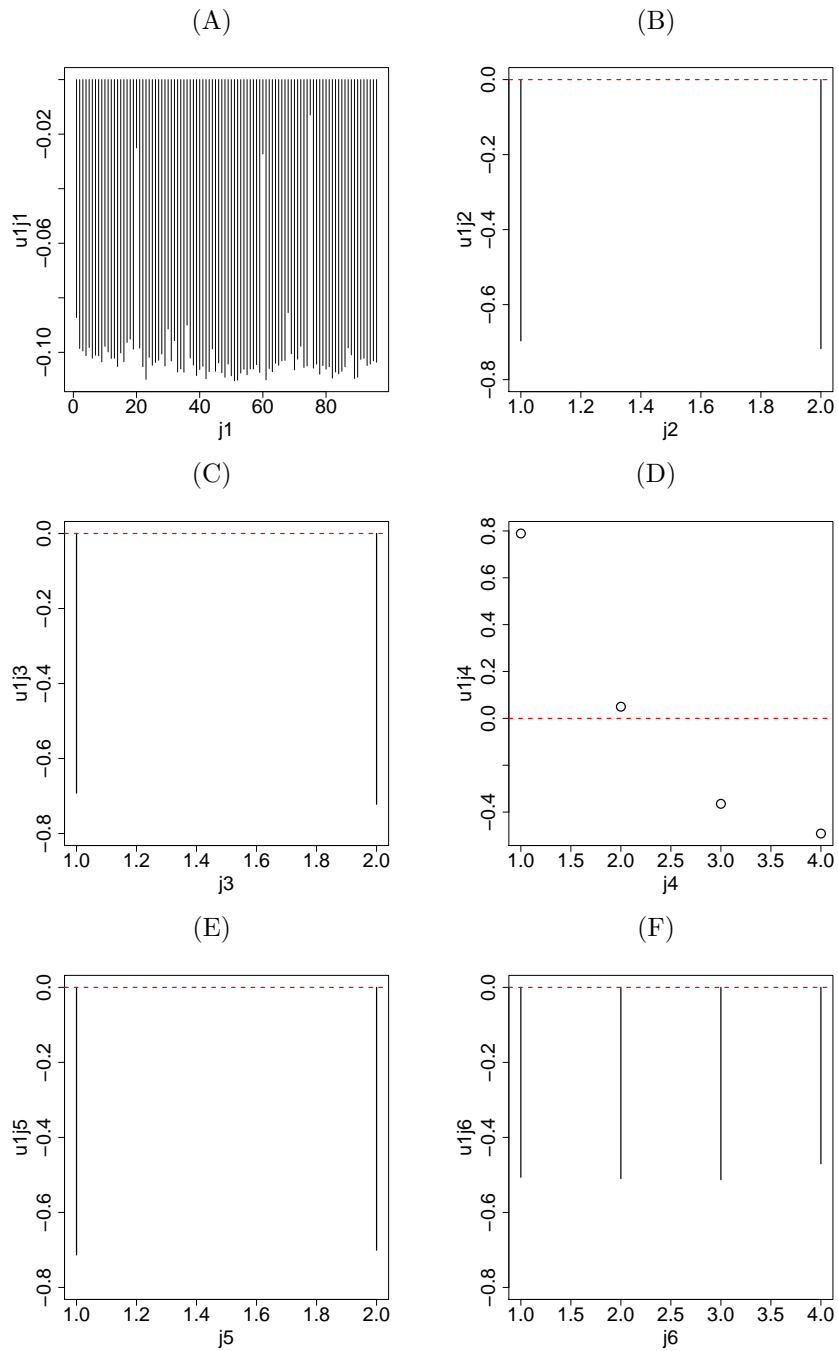

Figure 10: Singular value vectors. (A)  $u_{1j_1}$  (B)  $u_{1j_2}$  (C)  $u_{1j_3}$  (D)  $u_{2j_4}$  (E)  $u_{1j_5}$  (F)  $u_{1j_6}$ .

Table 3: Top ranked 10 compounds listed in “DrugMatrix” category in Enrichr. Overlap is that between selected 401 genes and genes selected in individual experiments.

| Term                                                      | Overlap | P-value                | Adjusted P-value       |
|-----------------------------------------------------------|---------|------------------------|------------------------|
| Cyclosporin_A-350_mg/kg_in_Corn_Oil-Rat-Bone_marrow-5d-up | 51/315  | $2.26 \times 10^{-31}$ | $1.78 \times 10^{-27}$ |
| Isoprenaline-4.2_mg/kg_in_Saline-Rat-Heart-5d-up          | 49/304  | $4.55 \times 10^{-30}$ | $1.79 \times 10^{-26}$ |
| Hydroxyurea-400_mg/kg_in_Saline-Rat-Bone_marrow-5d-up     | 46/307  | $7.54 \times 10^{-27}$ | $1.49 \times 10^{-23}$ |
| Netilmicin-40_mg/kg_in_Saline-Rat-Kidney-28d-up           | 45/314  | $1.90 \times 10^{-25}$ | $1.50 \times 10^{-22}$ |
| Cyclosporin_A-350_mg/kg_in_Corn_Oil-Rat-Bone_marrow-3d-up | 45/312  | $1.45 \times 10^{-25}$ | $1.42 \times 10^{-22}$ |
| Chlorambucil-0.6_mg/kg_in_Corn_Oil-Rat-Spleen-0.25d-up    | 47/314  | $2.13 \times 10^{-27}$ | $5.60 \times 10^{-24}$ |
| Tobramycin-40_mg/kg_in_Saline-Rat-Kidney-28d-up           | 45/311  | $1.26 \times 10^{-25}$ | $1.42 \times 10^{-22}$ |
| Gemcitabine-11_mg/kg_in_Saline-Rat-Bone_marrow-3d-up      | 47/344  | $1.27 \times 10^{-25}$ | $1.42 \times 10^{-22}$ |
| Terbutaline-130_mg/kg_in_Corn_Oil-Rat-Heart-3d-up         | 45/321  | $4.89 \times 10^{-25}$ | $2.41 \times 10^{-22}$ |
| Cyclosporin_A-70_mg/kg_in_Corn_Oil-Rat-Bone_marrow-3d-up  | 45/320  | $4.28 \times 10^{-25}$ | $2.25 \times 10^{-22}$ |

Table 4: Top ranked 10 compounds listed in “Drug Perturbations from GEO up” category in Enrichr. Overlap is that between selected 401 genes and genes selected in individual experiments.

| Term                                            | Overlap | P-value                | Adjusted P-value       |
|-------------------------------------------------|---------|------------------------|------------------------|
| imatinib DB00619 mouse GSE51698 sample 2522     | 81/288  | $2.27 \times 10^{-70}$ | $2.05 \times 10^{-67}$ |
| bleomycin DB00290 mouse GSE2640 sample 2851     | 80/329  | $6.09 \times 10^{-64}$ | $2.75 \times 10^{-61}$ |
| soman 7305 rat GSE13428 sample 2640             | 86/532  | $3.87 \times 10^{-53}$ | $3.50 \times 10^{-51}$ |
| coenzyme Q10 5281915 mouse GSE15129 sample 3464 | 76/302  | $6.84 \times 10^{-62}$ | $2.06 \times 10^{-59}$ |
| N-METHYLFORMAMIDE 31254 rat GSE5509 sample 3570 | 70/283  | $2.39 \times 10^{-56}$ | $3.60 \times 10^{-54}$ |
| Calcitonin 16132288 mouse GSE60761 sample 3446  | 65/220  | $8.51 \times 10^{-58}$ | $1.92 \times 10^{-55}$ |
| cyclophosphamide 2907 mouse GSE2254 sample 3626 | 78/413  | $2.47 \times 10^{-53}$ | $2.48 \times 10^{-51}$ |
| Calcitonin 16132288 mouse GSE60761 sample 3447  | 59/177  | $5.88 \times 10^{-56}$ | $7.59 \times 10^{-54}$ |
| PRISTANE 15979 mouse GSE17297 sample 3229       | 71/291  | $1.03 \times 10^{-56}$ | $1.87 \times 10^{-54}$ |
| coenzyme Q10 5281915 mouse GSE15129 sample 3456 | 76/396  | $1.79 \times 10^{-52}$ | $1.35 \times 10^{-50}$ |

Table 5: Summary of enrichment analysis for three threshold adjusted P-value

| threshold adjusted P-value                                             | 0.005        | 0.01         | 0.005         |
|------------------------------------------------------------------------|--------------|--------------|---------------|
| the number of genes                                                    | 370          | 401          | 498           |
| LINCS_L1000_Chem_Pert_up                                               |              |              |               |
|                                                                        | rank         |              |               |
| alvocidib                                                              | 2nd          | 1st          | 1st           |
| AZD-8055                                                               | 1st          | 2nd          | 3rd           |
| number of experiments associated with adjusted P-values less than 0.05 |              |              |               |
| alvocidib                                                              | 38           | 65           | 52            |
| AZD-8055                                                               | 23           | 6            | 13            |
| DrugMatrix                                                             |              |              |               |
|                                                                        | rank         |              |               |
| cyclosporin-A                                                          | 2nd,5th,11th | 1st,5th,10th | 2nd, 5th, 7th |
| number of experiments associated with adjusted P-values less than 0.05 |              |              |               |
| cyclosporin-A                                                          | 28           | 57           | 28            |
| Drug_Perturbations_from_GEO_up                                         |              |              |               |
|                                                                        | rank         |              |               |
| imatinib                                                               | 1st          | 1st          | 1st           |
| number of experiments associated with adjusted P-values less than 0.05 |              |              |               |
| imatinib                                                               | 18           | 18           | 19            |
