# Supplementary material for: Neurological disorder drug discovery from gene expression with tensor decomposition
Source: bioRxiv or medRxiv preprint supplement (doi:10.1101/704163), 2019-10-03
Supplement: Supplementary file [file media-2.pdf]

## Supplementary document

In order to test various methods employed in “Synthetic study of TDs” in main text in more realistic situation, we added noise to  $x_{ijk}$  as follows.

For data set 1:  $x_{ijk} \rightarrow x_{ijk} + \mathcal{N}(0, 1)$

For data set 2:  $x_{ijk} \rightarrow x_{ijk} + \mathcal{N}(0, 300)$

$\mu$ s are decided such that amplitude should be the same order between signals and noises.

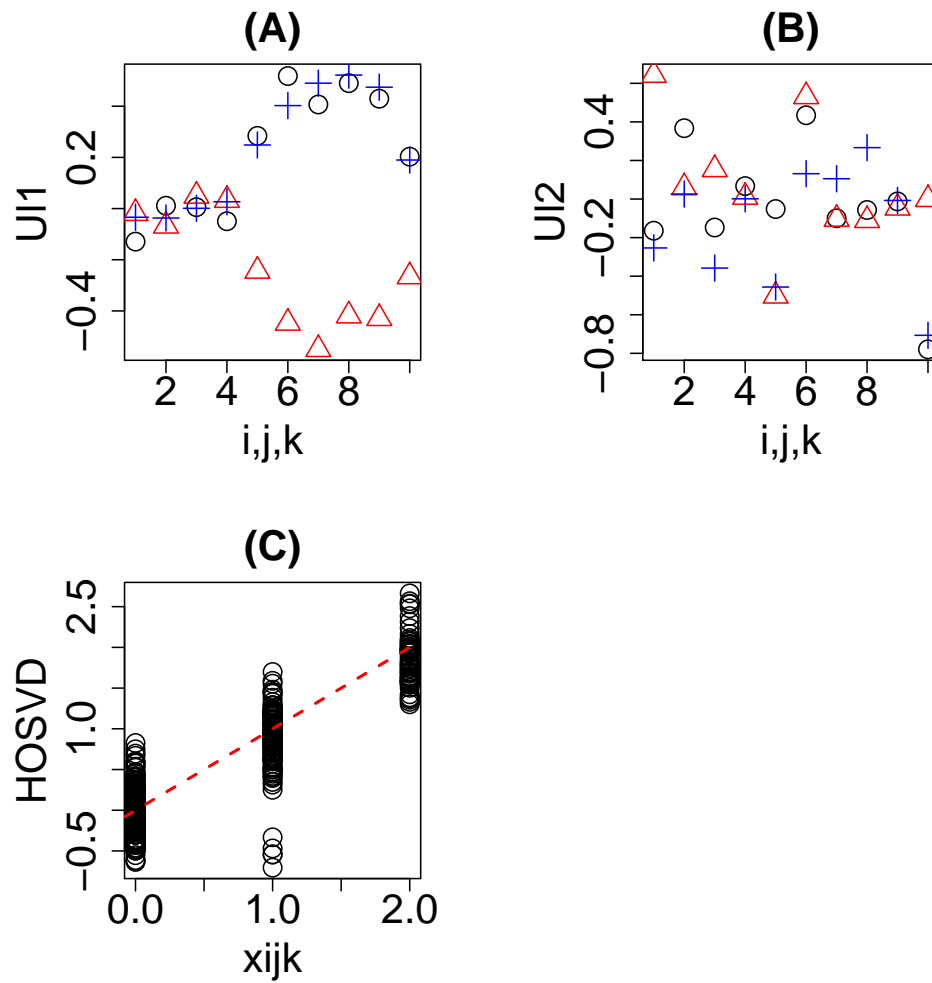

Figure S1: Results of HOSVD applied to data set 1 with adding noise. It corresponds to Fig. 2 in main test

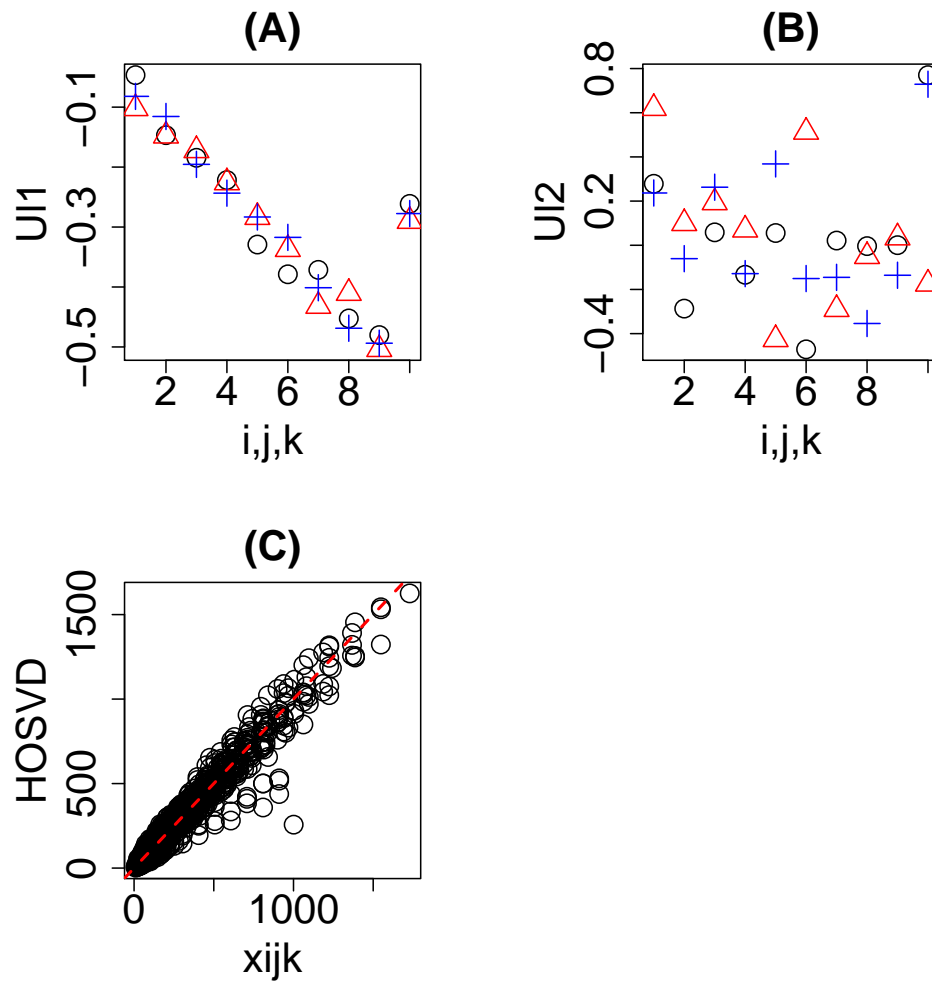

Figure S2: Results of HOSVD applied to data set 2 with adding noise. It corresponds to Fig. 3 in main test

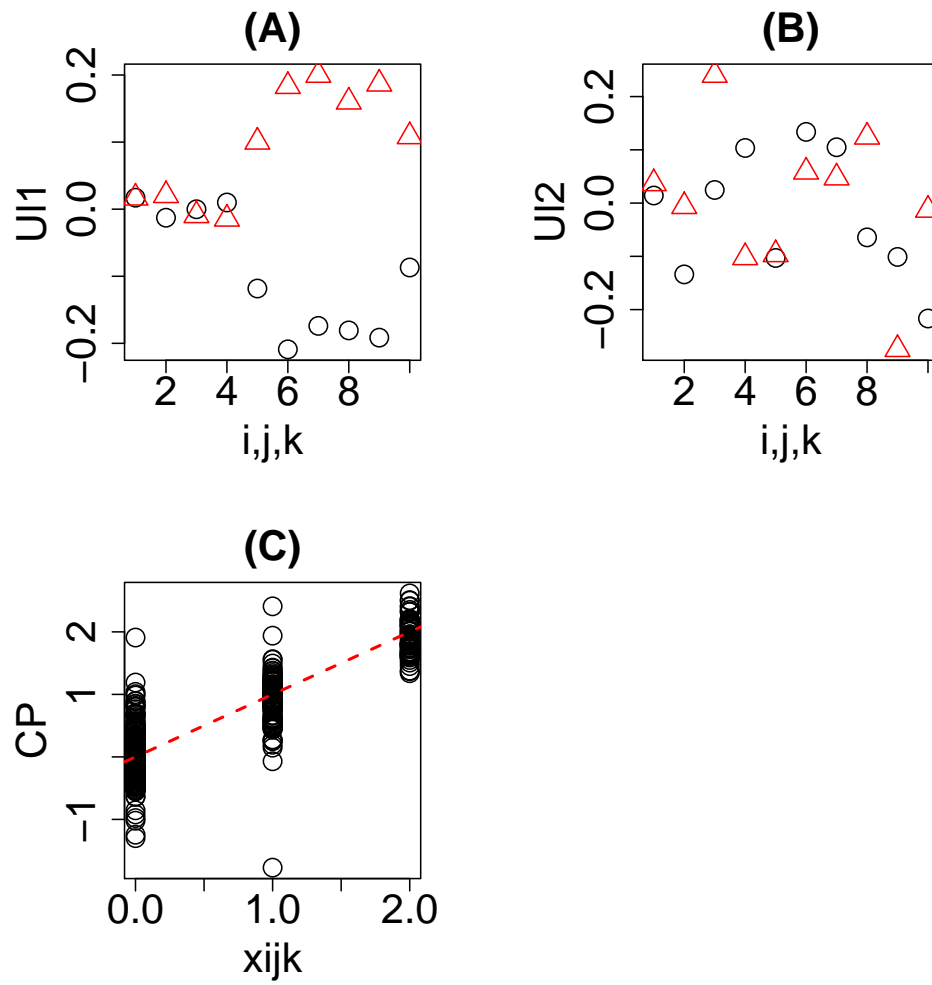

Figure S3: Results of CP decomposition applied to data set 1 with adding noise. It corresponds to Fig. 4 in main test

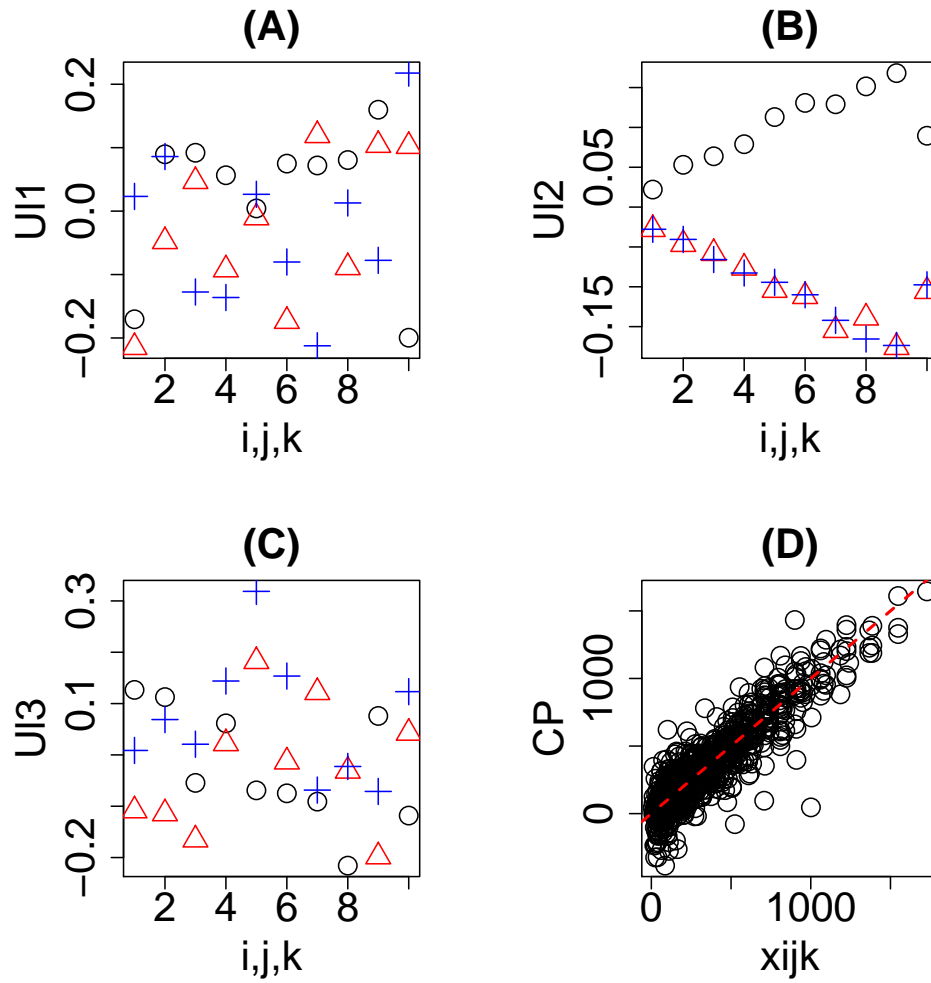

Figure S4: Results of CP decomposition applied to data set 2 with adding noise. It corresponds to Fig. 5 in main test

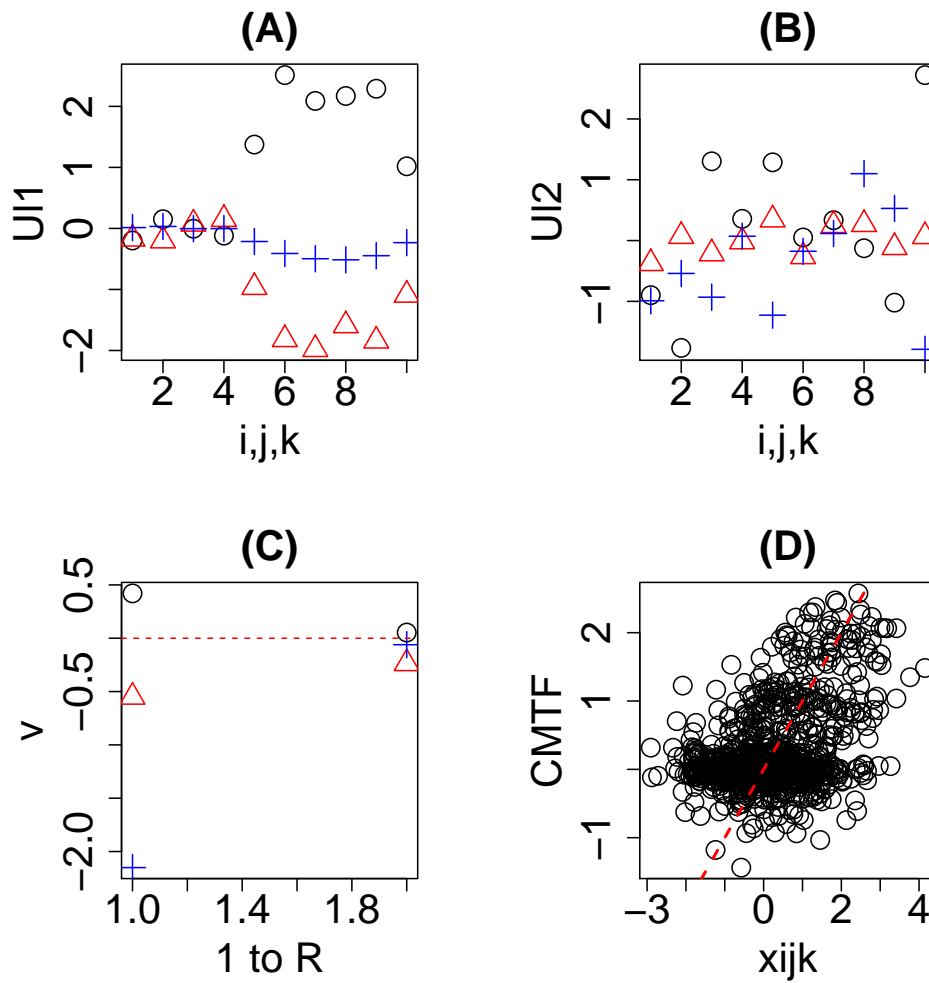

Figure S5: Results of CMTF, with replacing ALS with BFGS, applied to data set 1 with adding noise. It corresponds to Fig. 8 in main test

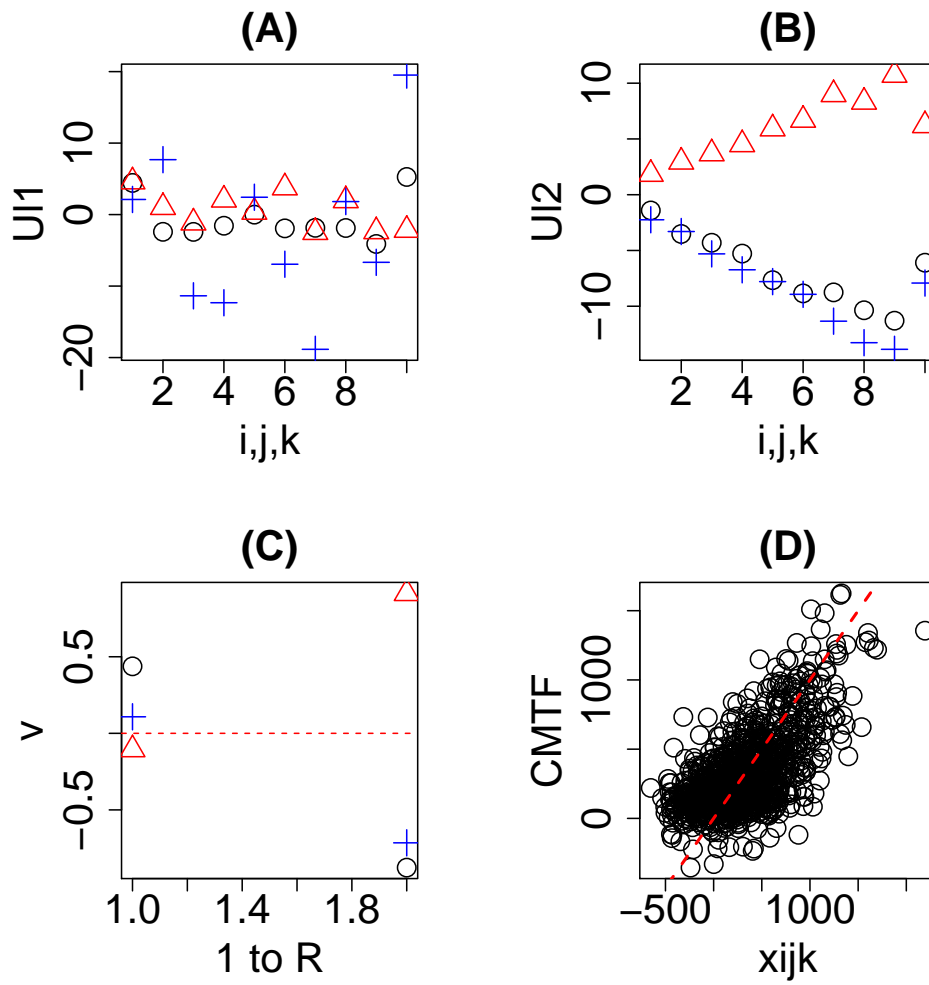

Figure S6: Results of CMTF, with replacing ALS with BFGS, applied to data set 2 with adding noise. It corresponds to Fig. 9 in main test
